# Supplementary material
Source: publisher figshare collection journal article supplement (https://tandf.figshare.com/articles/dataset/_/1568909)
Supplement: Supplementary file 1 [file 1]

## Sheet: Zircon analyses
Table 2.1 - Zircon analyses
U (ppm)	206Pb/ 204Pb	U/Th	Isotopic ratios						Apparent ages (Ma)						Best age (Ma)	± (Ma)	Conc. (%)
			207Pb/ 235U	± (%)	206Pb/ 238U	± (%)	Error corr.		206Pb/ 238U	± (Ma)	207Pb/ 235U	± (Ma)	206Pb/ 207Pb	± (Ma)
Sample 1DG
633.474	82973	44.2597	0.423316	1.44898	0.0571846	0.934669	0.645052		358.481	3.25915	358.42	4.37582	358.001	24.9835	358.481	3.25915	NA
542.705	78985.6	3.97201	0.490764	1.813	0.0645123	1.26413	0.697259		403.009	4.93858	405.431	6.06033	419.229	29.0223	403.009	4.93858	96.131
483.491	24280.3	7.78077	0.552675	4.73041	0.0707844	4.49763	0.950791		440.88	19.1663	446.747	17.0985	477.052	32.4089	440.88	19.1663	92.4176
93.9655	5882.42	5.6873	0.535476	5.36545	0.0711607	1.01214	0.18864		443.145	4.33456	435.438	19.0013	394.856	118.217	443.145	4.33456	112.229
206.892	102352	1.45232	0.561724	3.74083	0.0717069	3.30229	0.882769		446.431	14.2436	452.648	13.6629	484.37	38.8077	446.431	14.2436	92.1674
303.517	55691.5	2.61739	0.569297	2.16753	0.0736214	1.2886	0.594498		457.937	5.69623	457.56	7.98433	455.646	38.6813	457.937	5.69623	100.503
210.922	62372.4	2.81282	0.570768	2.3252	0.0739759	0.544866	0.234331		460.065	2.41938	458.511	8.57922	450.711	50.2294	460.065	2.41938	102.075
158.966	41143.5	6.25582	0.571598	2.9411	0.0741129	1.31497	0.447099		460.887	5.84893	459.048	10.8619	449.83	58.4569	460.887	5.84893	102.458
215.617	61126.3	2.09722	0.574194	1.90481	0.0742666	0.708793	0.372107		461.81	3.15878	460.724	7.05488	455.323	39.2386	461.81	3.15878	101.425
125.582	51743.1	3.90063	0.591516	5.01367	0.0743825	0.912142	0.181931		462.505	4.07092	471.836	18.9231	517.452	108.298	462.505	4.07092	89.3812
263.751	105928	3.62017	0.592095	2.84619	0.0744008	0.630473	0.221515		462.615	2.81446	472.204	10.7481	519.058	60.9406	462.615	2.81446	89.1257
103.421	29435	1.07853	0.559913	6.13782	0.0748885	1.837	0.299292		465.541	8.25048	451.47	22.3735	380.405	131.771	465.541	8.25048	122.38
468.199	122040	5.35085	0.586042	1.38614	0.0754946	1.00754	0.726867		469.174	4.55921	468.337	5.20063	464.232	21.1067	469.174	4.55921	101.065
142.823	102965	2.65564	0.586976	3.00518	0.0758252	0.813712	0.27077		471.156	3.6971	468.935	11.2867	458.079	64.1796	471.156	3.6971	102.855
545.003	158503	1.8016	0.597398	1.17181	0.0764007	0.461351	0.393708		474.603	2.11093	475.581	4.4498	480.278	23.8025	474.603	2.11093	98.8183
172.736	145049	5.87743	0.606788	2.68369	0.0766658	1.04139	0.388044		476.191	4.78027	481.532	10.291	507.024	54.4086	476.191	4.78027	93.9187
211.446	85710.9	12.9304	0.590815	3.02281	0.0768568	1.45076	0.479935		477.334	6.67478	471.388	11.3996	442.521	58.9977	477.334	6.67478	107.867
233.014	45511	2.68985	0.611649	5.13545	0.0768879	2.11355	0.411561		477.52	9.7279	484.6	19.7923	518.204	102.796	477.52	9.7279	92.1491
304.636	105076	3.35678	0.604098	2.83084	0.07726	2.3657	0.835688		479.747	10.9374	479.831	10.8253	480.209	34.355	479.747	10.9374	99.9038
575.231	208476	1.45605	0.609109	1.08495	0.0775509	0.694047	0.639702		481.487	3.22	482.998	4.17016	490.174	18.3919	481.487	3.22	98.2279
148.806	69399.1	2.72917	0.598338	3.94961	0.0776041	1.91983	0.486082		481.806	8.91267	476.179	15.0139	449.139	76.7194	481.806	8.91267	107.273
194.362	83955.7	5.88066	0.597136	5.17393	0.0788083	1.16185	0.224558		489.006	5.47136	475.415	19.6443	410.335	112.826	489.006	5.47136	119.172
111.814	3268.26	3.37297	0.666112	6.79424	0.0810767	2.1437	0.315517		502.546	10.3639	518.346	27.588	588.62	140.007	502.546	10.3639	85.3771
276.341	102819	1.58962	0.645723	3.55968	0.0812873	2.81111	0.789708		503.802	13.6231	505.843	14.1827	515.063	47.9585	503.802	13.6231	97.8136
65.1709	2800.66	0.516024	0.712438	11.8976	0.0830401	5.91442	0.497112		514.243	29.2333	546.193	50.3008	681.796	221.011	514.243	29.2333	75.4248
256.035	25545.1	2.60021	0.761384	2.55672	0.0905782	2.33643	0.913841		558.956	12.5095	574.808	11.2223	638.012	22.357	558.956	12.5095	87.609
403.831	419407	1.42925	0.746481	1.70071	0.0922115	1.01664	0.59777		568.603	5.53302	566.181	7.38115	556.483	29.7371	568.603	5.53302	102.178
241.972	56199.7	1.5339	0.760173	1.84577	0.0941669	0.944111	0.5115		580.134	5.23788	574.11	8.0942	550.32	34.6506	580.134	5.23788	105.418
87.9712	48527.8	0.503716	0.763547	6.91071	0.0942583	1.5383	0.222597		580.672	8.542	576.054	30.39	557.884	147.071	580.672	8.542	104.085
178.848	75023.2	0.853672	0.759185	3.81942	0.0946702	2.72316	0.712979		583.098	15.1818	573.54	16.738	535.816	58.6345	583.098	15.1818	108.824
71.9075	29525.6	0.377203	0.76964	5.85807	0.0959104	1.94616	0.332219		590.398	10.9796	579.557	25.8751	537.278	121.006	590.398	10.9796	109.887
137.243	5488.16	2.58447	1.03896	8.74288	0.0961351	8.39676	0.960411		591.719	47.474	723.401	45.265	1156.55	48.3269	591.719	47.474	51.1622
79.0696	26120.5	1.68381	0.802567	6.27175	0.096758	4.4449	0.708718		595.381	25.2789	598.276	28.361	609.241	95.7131	595.381	25.2789	97.725
167.636	31822.9	0.787744	0.841386	9.07803	0.0974912	0.863229	0.0950899		599.69	4.94321	619.91	42.1426	694.44	192.989	599.69	4.94321	86.3559
205.134	95933.8	1.07563	0.807152	2.36914	0.0975416	1.06906	0.451242		599.986	6.12474	600.855	10.7448	604.117	45.7641	599.986	6.12474	99.3161
146.81	60091.6	2.44677	0.833998	2.9275	0.0988308	1.60898	0.549608		607.553	9.3289	615.828	13.5182	646.39	52.5532	607.553	9.3289	93.9918
305.435	88385.4	1.2294	0.815179	2.21177	0.0993026	1.28329	0.580212		610.321	7.47288	605.355	10.086	586.831	39.0704	610.321	7.47288	104.003
85.4131	49534.2	1.74471	0.830398	7.45943	0.0996776	1.78396	0.239155		612.52	10.424	613.833	34.375	618.662	156.505	612.52	10.424	99.0072
1320.67	609097	102.279	0.837537	0.798545	0.100661	0.693566	0.868537		618.28	4.08896	617.786	3.69572	615.955	8.54609	618.28	4.08896	100.377
540.926	126387	1.54461	0.861055	1.91323	0.101933	1.77737	0.928987		625.728	10.5988	630.699	8.98835	648.542	15.207	625.728	10.5988	96.4822
115.463	37902.4	1.06474	0.859764	3.15861	0.102735	1.14404	0.362198		630.42	6.87083	629.994	14.8279	628.447	63.4565	630.42	6.87083	100.314
427.361	234350	0.881092	0.864878	1.19624	0.103218	0.787373	0.658205		633.241	4.74891	632.782	5.63324	631.164	19.4179	633.241	4.74891	100.329
197.91	79970.8	3.20014	0.861045	1.79279	0.103223	0.553481	0.308725		633.27	3.33837	630.693	8.42246	621.445	36.777	633.27	3.33837	101.903
174.18	57903.3	0.526185	0.890603	2.27701	0.105269	1.28133	0.562726		645.216	7.8671	646.693	10.8917	651.874	40.4123	645.216	7.8671	98.9787
215.967	110779	4.81386	0.900761	1.87684	0.105378	1.45534	0.775423		645.852	8.94385	652.134	9.03131	673.948	25.3432	645.852	8.94385	95.8312
377.451	219462	0.835502	0.897676	1.58492	0.106578	1.26178	0.796115		652.841	7.83403	650.485	7.61277	642.337	20.6196	652.841	7.83403	101.635
546.21	327480	1.14616	0.894837	1.40173	0.107004	1.1774	0.839959		655.325	7.33656	648.964	6.72161	626.88	16.4151	655.325	7.33656	104.538
42.8525	21080.1	0.793002	0.978444	6.81478	0.108441	1.98898	0.291863		663.689	12.5438	692.807	34.2341	788.481	136.968	663.689	12.5438	84.173
80.9207	34312.1	7.28331	0.956904	6.58364	0.109591	4.19332	0.63693		670.373	26.6988	681.691	32.6998	719.222	107.816	670.373	26.6988	93.2081
274.117	82861.5	3.1969	0.952088	1.32851	0.111829	0.496534	0.373752		683.363	3.21947	679.189	6.5793	665.401	26.3876	683.363	3.21947	102.699
632.14	241210	0.617375	0.954247	1.02043	0.111962	0.70586	0.691729		684.131	4.5816	680.312	5.05938	667.684	15.7922	684.131	4.5816	102.463
457.479	102915	6.00763	0.95902	1.68566	0.112015	1.32922	0.788545		684.437	8.63135	682.788	8.37911	677.379	22.1584	684.437	8.63135	101.042
105.092	34142.2	1.18447	1.00664	3.37523	0.116742	1.07814	0.319427		711.783	7.26552	707.173	17.194	692.539	68.2091	711.783	7.26552	102.779
218.943	129933	4.17586	1.01748	2.24289	0.117134	1.68581	0.751623		714.045	11.3947	712.646	11.4861	708.237	31.4516	714.045	11.3947	100.82
100.997	53138.3	1.05883	1.04698	3.04283	0.117287	2.58858	0.850714		714.931	17.5173	727.383	15.804	765.937	33.6776	714.931	17.5173	93.3407
50.741	27021.6	1.60336	1.03417	5.26104	0.118573	1.92637	0.366157		722.346	13.1638	721.011	27.165	716.838	104.044	722.346	13.1638	100.768
343.039	249803	1.28732	1.07707	1.24711	0.12087	0.884568	0.709293		735.569	6.14912	742.202	6.5665	762.243	18.533	735.569	6.14912	96.5006
184.435	85288.8	1.0338	1.14448	1.8473	0.127254	0.412197	0.223134		772.182	2.99967	774.63	10.0108	781.676	37.8648	772.182	2.99967	98.7853
122.184	62192.7	1.04087	1.17421	3.1289	0.130829	1.33604	0.427		792.595	9.96428	788.615	17.1596	777.355	59.5185	792.595	9.96428	101.96
59.6658	26720.9	1.48792	1.21495	7.7083	0.132552	1.71783	0.222854		802.408	12.9607	807.461	42.9578	821.442	157.117	802.408	12.9607	97.6829
101.296	5604.44	1.62244	1.25804	3.87819	0.134003	0.908667	0.234302		810.664	6.92189	827.026	21.9427	871.258	78.1419	810.664	6.92189	93.0452
349.35	195003	4.35769	1.22374	1.44944	0.134704	1.05075	0.724932		814.644	8.04107	811.485	8.09926	802.812	20.9297	814.644	8.04107	101.474
428.344	366889	1.27535	1.25774	1.04139	0.135838	0.916598	0.880171		821.082	7.06645	826.89	5.89065	842.556	10.268	821.082	7.06645	97.4513
190.965	142261	1.79422	1.31622	2.234	0.140681	1.86901	0.836622		848.514	14.8595	852.858	12.891	864.194	25.3878	848.514	14.8595	98.1856
179.079	81260.9	1.36808	1.34011	2.49091	0.14111	1.85859	0.746149		850.936	14.8161	863.277	14.4851	895.077	34.2375	850.936	14.8161	95.0684
60.9259	15644	0.619462	1.516	3.96532	0.155918	0.68531	0.172826		934.051	5.95901	936.863	24.2649	943.492	80.0182	943.492	80.0182	98.9994
92.0081	12477.9	1.93123	1.40714	3.84881	0.143639	2.63119	0.683638		865.207	21.3037	891.953	22.8489	958.835	57.4171	958.835	57.4171	90.2352
312.606	443327	1.23454	1.71	2.14517	0.168626	2.0443	0.952979		1004.54	19.0157	1012.29	13.745	1029.07	13.1438	1029.07	13.1438	97.6155
39.2011	34779.5	2.54147	1.74922	4.26829	0.171766	1.13698	0.266379		1021.83	10.7441	1026.87	27.582	1037.61	83.1173	1037.61	83.1173	98.4791
91.7953	61646.7	0.654257	1.66736	3.85635	0.162687	3.09613	0.802865		971.694	27.9274	996.183	24.4815	1050.51	46.3458	1050.51	46.3458	92.4973
63.0689	30001.9	0.989018	1.89794	2.79895	0.182337	2.2799	0.814556		1079.73	22.6657	1080.37	18.6151	1081.64	32.5524	1081.64	32.5524	99.8227
194.713	122556	0.901784	2.05175	1.57526	0.193906	0.94736	0.6014		1142.5	9.91871	1132.88	10.7541	1114.47	25.1159	1114.47	25.1159	102.515
91.6448	158650	0.908087	4.52784	4.51997	0.294052	4.43417	0.981017		1661.75	64.9557	1736.1	37.6097	1826.88	15.8943	1826.88	15.8943	90.9612
309.467	459659	10.4299	5.19746	0.978725	0.333623	0.841092	0.859375		1855.92	13.5639	1852.2	8.33447	1848.01	9.05096	1848.01	9.05096	100.428
49.1803	42939.5	0.855589	5.34387	1.49774	0.340075	0.863433	0.57649		1887.03	14.1252	1875.91	12.8113	1863.6	22.0946	1863.6	22.0946	101.258
195.7	88457.9	0.782432	4.47899	2.54911	0.283668	2.45673	0.963761		1609.81	34.9976	1727.09	21.1622	1872.27	12.2648	1872.27	12.2648	85.9816
320.471	302533	4.87901	4.96112	0.831151	0.310061	0.756013	0.909598		1741.01	11.5346	1812.72	7.02374	1896.17	6.20873	1896.17	6.20873	91.817
156.515	20451.6	1.09711	4.79033	1.94016	0.295233	1.68242	0.867155		1667.63	24.7213	1783.21	16.2992	1921.26	17.3244	1921.26	17.3244	86.7984
170.311	168716	1.38694	5.8425	6.44636	0.347518	6.43567	0.998343		1922.73	107.003	1952.74	55.9458	1984.69	6.60291	1984.69	6.60291	96.8785
112.38	29946.1	1.1588	5.08628	2.21183	0.301268	2.05227	0.92786		1697.59	30.6297	1833.82	18.7707	1992.16	14.6658	1992.16	14.6658	85.2135
255.792	754101	3.81545	6.48435	0.89455	0.361834	0.838474	0.937313		1990.86	14.3613	2043.78	7.86965	2097.59	5.47693	2097.59	5.47693	94.9117
85.8658	66930.3	1.78051	7.2658	1.18167	0.390328	1.14252	0.966867		2124.35	20.6774	2144.62	10.5473	2164.07	5.26067	2164.07	5.26067	98.1643
134.624	136886	1.40167	7.52231	0.806649	0.401045	0.739779	0.917101		2173.85	13.6509	2175.65	7.22963	2177.33	5.5998	2177.33	5.5998	99.8401
451.515	110735	6.81423	7.38923	3.18703	0.386141	3.13692	0.984277		2104.91	56.3341	2159.67	28.5107	2212.13	9.76558	2212.13	9.76558	95.1531
425.959	111564	6.60553	9.69233	1.95177	0.415087	1.94098	0.994471		2238.14	36.7028	2405.98	17.9663	2551.23	3.42996	2551.23	3.42996	87.7278
Sample 2-BB
238.84	23924.7	2.32266	0.535594	2.38645	0.0699026	1.05731	0.443045		435.569	4.45316	435.515	8.45185	435.208	47.6694	435.569	4.45316	100.083
133.184	17723	2.74355	0.60341	8.05981	0.0712954	7.40527	0.91879		443.955	31.7698	479.396	30.8075	652.699	68.2769	443.955	31.7698	68.0184
132.697	4981.25	3.10603	0.577697	5.60001	0.0722562	0.979681	0.174943		449.734	4.25578	462.98	20.8236	529.256	120.9	449.734	4.25578	84.9748
198.288	77253.8	2.55555	0.57258	2.66012	0.0727135	1.08478	0.407793		452.483	4.74013	459.682	9.83486	495.831	53.5346	452.483	4.74013	91.2574
176.513	74398.4	2.10117	0.561491	3.39244	0.0737361	0.760249	0.224101		458.625	3.36556	452.496	12.387	421.454	73.8189	458.625	3.36556	108.82
229.595	34754.4	4.42	0.57556	3.00426	0.073985	2.00132	0.666161		460.12	8.88754	461.604	11.144	469.01	49.6102	460.12	8.88754	98.1044
313.568	34553.1	5.70039	0.577859	2.15266	0.074537	1.82208	0.846432		463.432	8.14771	463.085	8.00511	461.343	25.4194	463.432	8.14771	100.453
359.611	175944	1.89692	0.579139	4.92163	0.0745993	4.68746	0.952421		463.805	20.9771	463.908	18.3294	464.43	33.2555	463.805	20.9771	99.8654
707.496	232320	28.5884	0.593778	1.23825	0.0763795	0.615309	0.496917		474.476	2.81464	473.277	4.68424	467.465	23.7957	474.476	2.81464	101.5
494.638	57256.9	7.77688	0.596932	1.17712	0.0765958	0.710981	0.604003		475.771	3.26084	475.285	4.46777	472.926	20.756	475.771	3.26084	100.602
220.843	56615.4	3.00356	0.655767	1.86639	0.082362	0.849195	0.454992		510.206	4.16562	512.021	7.50571	520.114	36.4624	510.206	4.16562	98.095
285.987	21310.8	1.1161	0.654185	2.37575	0.082542	1.07199	0.45122		511.278	5.26911	511.051	9.54025	510.057	46.5956	511.278	5.26911	100.239
234.689	63031.6	1.01931	0.661534	1.85237	0.0826455	1.09773	0.592608		511.894	5.4019	515.552	7.48872	531.817	32.6803	511.894	5.4019	96.2538
234.411	58046.6	1.97312	0.660546	2.76343	0.0826624	1.35046	0.48869		511.995	6.64684	514.948	11.1622	528.094	52.8494	511.995	6.64684	96.9515
160.088	42173.2	0.659702	0.652055	3.33552	0.0837726	1.28528	0.385331		518.602	6.40441	509.743	13.3684	470.176	68.1425	518.602	6.40441	110.3
215.183	36988.7	1.58295	0.714826	3.68983	0.0875063	1.54993	0.420054		540.772	8.03966	547.608	15.6189	576.131	72.8133	540.772	8.03966	93.8626
172.749	44732	1.57529	0.71703	3.76022	0.0877896	2.04747	0.544507		542.451	10.652	548.912	15.9455	575.818	68.5781	542.451	10.652	94.2053
690.177	2853.87	1.26136	0.744401	4.54781	0.0883599	0.766865	0.168623		545.83	4.01347	564.971	19.7082	642.822	96.4078	545.83	4.01347	84.9115
304.418	88528.7	1.809	0.711933	1.44093	0.0884099	0.989632	0.6868		546.126	5.18204	545.893	6.08459	544.936	22.9086	546.126	5.18204	100.218
134.865	20498.9	1.41578	0.720136	2.9393	0.0891719	0.400584	0.136285		550.638	2.11419	550.747	12.4953	551.206	63.5565	550.638	2.11419	99.8968
115.472	33454.7	0.713104	0.74071	4.5574	0.0907142	1.3408	0.294203		559.76	7.18865	562.82	19.6935	575.212	94.7185	559.76	7.18865	97.3136
80.158	44761.7	2.17933	0.704762	5.62354	0.0910027	0.864479	0.153725		561.464	4.64838	541.631	23.61	459.026	123.316	561.464	4.64838	122.317
296.536	139278	1.82565	0.789005	5.28881	0.0944059	4.76851	0.901622		581.542	26.517	590.607	23.6884	625.576	49.3415	581.542	26.517	92.961
50.3696	4337.7	1.10862	0.793913	12.9255	0.0947129	4.37828	0.338731		583.35	24.4193	593.389	58.1465	631.981	262.787	583.35	24.4193	92.3049
79.2398	34419.1	1.28923	0.755961	4.59937	0.0949337	1.07846	0.234481		584.65	6.02777	571.677	20.108	520.399	98.1594	584.65	6.02777	112.346
146.069	218306	1.24346	0.785442	3.07149	0.0952219	1.28124	0.41714		586.346	7.18097	588.583	13.7206	597.232	60.4839	586.346	7.18097	98.1772
141.857	43982.7	1.14202	0.778706	4.65911	0.0961274	1.18753	0.254883		591.674	6.71348	584.745	20.7139	557.922	98.2954	591.674	6.71348	106.05
39.8441	15561.1	1.52731	0.780722	14.5678	0.09633	2.01692	0.138451		592.865	11.4242	585.895	64.9404	558.997	316.009	592.865	11.4242	106.059
55.4879	24610.1	1.30095	0.793624	4.99714	0.096428	2.13214	0.426672		593.441	12.0881	593.225	22.4546	592.378	97.9997	593.441	12.0881	100.18
141.385	55957.3	0.738151	0.783612	3.70849	0.0970362	0.90576	0.244239		597.016	5.16469	587.542	16.545	551.084	78.5412	597.016	5.16469	108.335
288.397	9641.02	0.676999	0.822576	2.7488	0.0973415	1.69436	0.616399		598.81	9.68902	609.484	12.5975	649.382	46.4975	598.81	9.68902	92.2123
156.959	75758.4	0.466566	0.820625	2.43565	0.0985291	0.849991	0.348979		605.783	4.91457	608.397	11.1477	618.124	49.275	605.783	4.91457	98.0035
148.715	31620	0.494946	0.832396	3.99702	0.0991854	1.11216	0.278248		609.633	6.4694	614.941	18.4385	634.553	82.6579	609.633	6.4694	96.073
171.074	226718	0.738386	0.846174	1.81477	0.0992006	0.659458	0.363384		609.722	3.83656	622.547	8.44595	669.461	36.167	609.722	3.83656	91.0766
168.937	72258.3	1.23352	0.814746	1.48996	0.0993124	0.898623	0.603119		610.378	5.23333	605.113	6.79231	585.464	25.7749	610.378	5.23333	104.255
217.668	84659.6	0.556845	0.828125	3.02022	0.0995535	0.495133	0.163939		611.792	2.88988	612.572	13.8927	615.436	64.332	611.792	2.88988	99.4079
92.857	45278.7	1.73096	0.844443	5.17898	0.0999813	1.29621	0.250283		614.299	7.59499	621.595	24.0802	648.265	107.749	614.299	7.59499	94.7605
563.456	23119	2.09112	0.854808	1.23305	0.101287	0.973441	0.78946		621.949	5.77142	627.285	5.7701	646.592	16.2386	621.949	5.77142	96.1888
332.608	3304.98	2.51237	0.88362	3.94556	0.101518	2.68879	0.681473		623.299	15.9745	642.936	18.7958	712.549	61.3553	623.299	15.9745	87.4744
281.553	112772	0.939473	0.849478	2.26627	0.101789	1.08988	0.480913		624.884	6.49081	624.362	10.5696	622.452	42.8627	624.884	6.49081	100.391
190.122	52672	0.701654	0.863915	1.80424	0.101978	0.75495	0.41843		625.99	4.5037	632.258	8.49141	654.713	35.1796	625.99	4.5037	95.6129
246.322	35743.7	1.39176	0.864289	2.5921	0.102582	1.08615	0.419023		629.524	6.51434	632.462	12.2025	642.997	50.6189	629.524	6.51434	97.9046
354.429	133700	1.20728	0.858397	1.23463	0.102623	0.863998	0.699804		629.763	5.18382	629.247	5.79056	627.371	19.0279	629.763	5.18382	100.381
384.225	75100.7	2.25796	0.872535	1.38072	0.10308	0.866304	0.627429		632.433	5.21862	636.943	6.53273	652.976	23.0751	632.433	5.21862	96.854
230.444	49758.8	0.701574	0.863974	2.04341	0.103904	1.13691	0.556381		637.244	6.89835	632.29	9.61743	614.594	36.6558	637.244	6.89835	103.685
359.09	38852.8	1.86381	0.874245	1.18998	0.104095	0.884594	0.743368		638.364	5.37634	637.87	5.63614	636.139	17.1414	638.364	5.37634	100.35
410.305	4643.13	0.825837	0.903056	2.88468	0.104761	1.05867	0.366998		642.252	6.4716	653.359	13.9001	691.914	57.208	642.252	6.4716	92.8225
191.489	24607.8	0.779249	0.883338	2.2657	0.104817	1.48803	0.656765		642.576	9.10063	642.784	10.7906	643.537	36.7267	642.576	9.10063	99.8506
250.602	121661	1.90459	0.90915	1.33802	0.106121	0.774844	0.579097		650.184	4.79218	656.605	6.46985	678.711	23.3114	650.184	4.79218	95.7969
120.431	49798.7	0.589539	0.920201	4.51623	0.107102	3.74419	0.829053		655.898	23.3502	662.466	21.9791	684.903	53.8986	655.898	23.3502	95.7652
252.546	140612	1.9107	0.900241	2.11634	0.107138	1.29969	0.614123		656.103	8.10771	651.857	10.1807	637.204	35.9492	656.103	8.10771	102.966
185.856	150269	2.01146	0.922798	3.12802	0.10798	2.25023	0.719376		661.005	14.137	663.839	15.2442	673.478	46.477	661.005	14.137	98.148
137.765	20607.5	1.08371	0.92056	2.71701	0.108089	1.45395	0.535129		661.637	9.14267	662.656	13.2242	666.126	49.1663	661.637	9.14267	99.3261
668.804	2616.3	2.73039	0.959801	2.60767	0.108207	0.963744	0.369581		662.325	6.06616	683.193	12.9681	752.537	51.1458	662.325	6.06616	88.0122
334.021	2421.82	0.41343	0.969777	7.58508	0.108268	1.72604	0.227558		662.682	10.8699	688.349	37.9356	773.136	155.637	662.682	10.8699	85.7135
257.23	18268.3	0.947824	0.943612	2.21891	0.10971	1.56415	0.70492		671.063	9.9686	674.771	10.9388	687.157	33.5786	671.063	9.9686	97.6579
431.188	105328	0.522139	0.937936	1.84347	0.110081	1.58601	0.860342		673.218	10.1387	671.801	9.05963	667.055	20.0982	673.218	10.1387	100.924
176.257	43021.3	0.932935	0.959791	3.05809	0.111443	1.92401	0.629154		681.124	12.4363	683.188	15.2083	690.012	50.6871	681.124	12.4363	98.7119
139.063	26797.6	0.669367	0.999537	3.81171	0.112716	3.29368	0.864097		688.503	21.5082	703.575	19.3496	751.981	40.4997	688.503	21.5082	91.5585
133.355	23435.8	1.52486	1.05009	4.81019	0.118231	1.77568	0.369149		720.374	12.1027	728.926	25.0227	755.294	94.3927	720.374	12.1027	95.3766
511.444	46935.5	9.7373	1.0842	2.73301	0.120868	1.66401	0.608856		735.559	11.5673	745.682	14.4368	776.17	45.6058	735.559	11.5673	94.7677
243.263	108598	4.00658	1.26501	3.01927	0.136018	2.65549	0.879512		822.105	20.4963	830.156	17.1237	851.781	29.8403	822.105	20.4963	96.5161
153.411	115287	1.44664	1.36797	2.7154	0.142298	2.1584	0.794874		857.645	17.3329	875.292	15.9294	920.218	33.8751	857.645	17.3329	93.2002
191.613	132314	1.02637	1.33588	1.65823	0.142625	0.703722	0.42438		859.49	5.66255	861.44	9.62955	866.481	31.1129	859.49	5.66255	99.1932
99.8788	80994.1	1.56026	1.58178	2.89419	0.160818	1.26089	0.435664		961.321	11.2608	963.07	18.0065	967.066	53.1622	967.066	53.1622	99.4059
92.9191	71244.9	0.845452	1.45481	4.56478	0.147619	4.22023	0.924518		887.605	34.9948	911.865	27.4755	971.078	35.4762	971.078	35.4762	91.404
126.317	78518.5	0.44014	1.67108	3.26816	0.167506	3.07491	0.940867		998.357	28.4397	997.597	20.7637	995.926	22.4831	995.926	22.4831	100.244
218.629	187712	1.09123	1.6859	2.77091	0.168646	2.65149	0.956904		1004.65	24.6663	1003.21	17.6619	1000.07	16.3321	1000.07	16.3321	100.458
239.853	45108.2	5.53171	1.60613	1.65475	0.160395	1.44751	0.874757		958.969	12.898	972.601	10.3553	1003.5	16.2727	1003.5	16.2727	95.562
248.586	182252	0.848603	1.64579	1.68946	0.163849	0.862104	0.510284		978.13	7.82393	987.938	10.6712	1009.77	29.4646	1009.77	29.4646	96.8668
34.7274	27637.2	0.6704	1.73248	9.16738	0.1724	3.16325	0.345055		1025.32	29.9858	1020.67	59.0848	1010.7	174.753	1010.7	174.753	101.446
144.691	62488	0.414412	1.76773	1.60526	0.175201	0.812353	0.506057		1040.71	7.80708	1033.69	10.4108	1018.85	28.0378	1018.85	28.0378	102.146
96.4079	30224.6	1.34076	1.65245	2.50129	0.163716	1.76614	0.706094		977.397	16.0173	990.491	15.8238	1019.59	35.8755	1019.59	35.8755	95.8618
339.981	52400.1	0.917024	1.8289	1.46267	0.176038	1.1031	0.754172		1045.3	10.6444	1055.89	9.60199	1077.83	19.2679	1077.83	19.2679	96.9818
610.343	510169	10.7662	5.50315	2.43577	0.329207	1.06531	0.437361		1834.54	17.0088	1901.09	20.9322	1974.52	39.0318	1974.52	39.0318	92.9105
303.099	349616	1.53614	6.43229	0.859503	0.371347	0.787694	0.916452		2035.74	13.7502	2036.69	7.55316	2037.64	6.0816	2037.64	6.0816	99.9068
52.8752	81016.5	0.732348	6.90461	1.65403	0.385321	1.18945	0.719119		2101.09	21.3274	2099.25	14.6711	2097.43	20.192	2097.43	20.192	100.175
140.206	266156	2.24741	7.29152	1.43111	0.387938	1.38659	0.968892		2113.26	24.984	2147.77	12.7794	2180.93	6.16267	2180.93	6.16267	96.897
222.775	379802	4.72161	8.86181	1.33055	0.427153	1.16013	0.871917		2292.87	22.384	2323.88	12.1408	2351.21	11.1335	2351.21	11.1335	97.5187
84.0871	164532	1.06407	10.5015	0.654502	0.469054	0.558504	0.853327		2479.41	11.4956	2480.05	6.06797	2480.56	5.75613	2480.56	5.75613	99.9538
171.442	191140	1.92297	9.89604	2.82489	0.435715	2.55662	0.905036		2331.43	50.0182	2425.14	26.0567	2504.73	20.2163	2504.73	20.2163	93.0811
223.43	148142	0.709727	11.9282	0.908761	0.478235	0.885727	0.974654		2519.57	18.4721	2598.78	8.51386	2661.1	3.3696	2661.1	3.3696	94.6816
11.954	29685.7	0.458563	12.81	3.30223	0.512834	1.79328	0.543051		2668.72	39.1884	2665.78	31.1121	2663.54	45.9501	2663.54	45.9501	100.194
96.284	270685	1.0647	21.8916	0.721563	0.635754	0.685264	0.949695		3172.31	17.1691	3178.93	7.00668	3183.1	3.57865	3183.1	3.57865	99.6608
Sample 3-SP
113.305	53439.4	1.26415	0.394557	6.02528	0.0544799	2.45999	0.408278		341.967	8.19312	337.693	17.311	308.341	125.336	341.967	8.19312	NA
258.371	43960.1	3.59174	0.53538	2.0131	0.0701971	1.12775	0.560204		437.343	4.76854	435.374	7.12768	424.951	37.2243	437.343	4.76854	102.916
221.681	104929	2.59298	0.550215	2.97389	0.0713586	1.0783	0.36259		444.336	4.62989	445.138	10.7179	449.264	61.5992	444.336	4.62989	98.9031
125.841	77701.6	1.80178	0.555203	4.01364	0.072718	1.971	0.491075		452.51	8.61312	448.399	14.55	427.347	77.9717	452.51	8.61312	105.888
347.661	107794	5.11236	0.572375	1.97366	0.0732818	0.755911	0.382999		455.897	3.32714	459.549	7.29517	477.828	40.3042	455.897	3.32714	95.4102
150.8	49756.2	2.40927	0.561587	4.90059	0.0734256	2.44863	0.49966		456.761	10.7974	452.559	17.8967	431.244	94.6547	456.761	10.7974	105.917
108.915	15268.8	2.09433	0.58059	3.37723	0.0734289	1.86354	0.551796		456.781	8.21774	464.84	12.5969	504.83	62.0035	456.781	8.21774	90.4822
188.403	81811	1.80381	0.573976	3.05487	0.0739511	1.13158	0.370418		459.916	5.023	460.583	11.3119	463.919	62.9081	459.916	5.023	99.137
222.782	43113	2.4483	0.576108	2.98906	0.074111	1.51987	0.508478		460.876	6.7602	461.957	11.0943	467.355	57.0059	460.876	6.7602	98.6136
283.854	143941	2.1378	0.581043	3.12028	0.074293	2.6221	0.840342		461.968	11.6894	465.131	11.6441	480.76	37.3708	461.968	11.6894	96.0912
89.7973	15466.1	1.66633	0.613161	9.48918	0.0747496	4.31146	0.454355		464.707	19.3306	485.552	36.639	585.199	183.771	464.707	19.3306	79.41
297.589	133549	2.04873	0.580196	2.82183	0.0750873	2.3993	0.850263		466.733	10.8025	464.587	10.5206	454.018	32.991	466.733	10.8025	102.8
97.1013	57339.6	1.89937	0.584363	4.81645	0.0760757	1.29808	0.269509		472.657	5.91591	467.261	18.0398	440.817	103.249	472.657	5.91591	107.223
648.259	26739.6	1.32335	0.593097	2.3514	0.0761398	2.19805	0.934786		473.04	10.0254	472.844	8.88896	471.877	18.4929	473.04	10.0254	100.247
79.4747	22575.5	3.94953	0.610813	7.45194	0.080165	1.34056	0.179894		497.108	6.41357	484.073	28.6997	422.794	163.788	497.108	6.41357	117.577
102.097	41317.7	1.74217	0.645132	4.31924	0.081424	1.75762	0.406928		504.617	8.53098	505.478	17.1999	509.382	86.7906	504.617	8.53098	99.0644
408.557	114147	1.50497	0.645828	0.991559	0.0824667	0.643014	0.648488		510.829	3.15793	505.908	3.95078	483.743	16.6679	510.829	3.15793	105.599
174.332	173380	2.2554	0.681006	4.51919	0.083375	3.77191	0.834644		516.237	18.7128	527.382	18.5918	575.899	54.1385	516.237	18.7128	89.6401
249.493	124712	6.87053	0.677706	1.94886	0.0851176	0.745492	0.382528		526.597	3.76967	525.387	7.99363	520.109	39.5197	526.597	3.76967	101.248
70.0221	25258.3	1.49663	0.714963	6.12649	0.086432	1.18837	0.193972		534.401	6.09454	547.689	25.9397	603.338	130.157	534.401	6.09454	88.5741
28.5347	15704.7	0.823926	0.678423	14.3558	0.0864677	3.45178	0.240445		534.612	17.7092	525.821	58.9854	487.809	308.818	534.612	17.7092	109.595
273.945	252757	0.639056	0.700376	1.62347	0.0866402	0.544764	0.335556		535.636	2.80001	539.016	6.78994	553.32	33.3864	535.636	2.80001	96.8041
70.1766	32417.5	1.95316	0.678439	5.54848	0.0867442	1.55805	0.280807		536.253	8.01701	525.831	22.7762	480.809	117.728	536.253	8.01701	111.531
196.024	117687	2.30448	0.697103	2.24177	0.0869988	0.569077	0.253851		537.763	2.93612	537.059	9.35024	534.066	47.4868	537.763	2.93612	100.692
207.749	72851.3	3.11597	0.694804	2.9997	0.0873043	1.67002	0.556728		539.575	8.64419	535.683	12.4874	519.124	54.703	539.575	8.64419	103.939
54.2966	23537.2	2.82237	0.667138	5.9636	0.0874502	1.98897	0.333518		540.44	10.3109	518.971	24.2362	425.525	125.496	540.44	10.3109	127.005
55.0514	46657.9	1.5496	0.65797	9.63368	0.0878103	3.97291	0.412398		542.574	20.6738	513.371	38.8386	385.349	197.464	542.574	20.6738	140.801
111.916	64579.3	0.910871	0.69111	3.16679	0.0880782	1.15047	0.363293		544.161	6.00347	533.467	13.1416	487.971	65.1347	544.161	6.00347	111.515
80.3096	26936.5	1.24757	0.684569	5.36814	0.0882406	0.979131	0.182397		545.123	5.11803	529.532	22.1539	462.91	117.043	545.123	5.11803	117.76
21.1436	11316.7	2.19024	0.59553	15.7784	0.0882461	4.33123	0.274503		545.156	22.6412	474.393	59.868	145.167	357.65	545.156	22.6412	375.537
294.043	49000.8	3.03485	0.71455	3.05666	0.0890402	2.05093	0.670971		549.858	10.8096	547.444	12.9355	537.427	49.5763	549.858	10.8096	102.313
73.7957	36553	1.08241	0.717795	4.52786	0.0891277	1.08219	0.239007		550.376	5.70894	549.364	19.2134	545.187	96.1378	550.376	5.70894	100.952
41.5566	13987.5	1.84813	0.688856	12.9729	0.0895196	1.89046	0.145725		552.695	10.0131	532.113	53.7783	444.78	286.38	552.695	10.0131	124.263
68.5191	29404.6	1.57702	0.715906	8.04376	0.0904272	2.49583	0.310282		558.063	13.3425	548.247	34.089	507.683	168.381	558.063	13.3425	109.923
318.522	131552	1.10046	0.749553	2.07146	0.0916259	1.62457	0.784265		565.146	8.79028	567.965	9.01142	579.28	27.9023	565.146	8.79028	97.5601
472.785	62894.2	1.72206	0.75218	1.43331	0.0917153	0.478384	0.333763		565.673	2.59076	569.489	6.24766	584.772	29.3083	565.673	2.59076	96.734
93.9113	65142.1	0.543689	0.767141	6.83598	0.093845	2.30217	0.336773		578.237	12.7324	578.121	30.1413	577.672	140.015	578.237	12.7324	100.098
27.5855	11639	1.61656	0.738225	9.16171	0.0958658	2.04211	0.222896		590.135	11.5161	561.369	39.5284	446.394	198.832	590.135	11.5161	132.201
40.9045	21052.5	0.46604	0.795041	10.6187	0.0959483	1.80867	0.170329		590.621	10.2076	594.027	47.7898	607.038	226.859	590.621	10.2076	97.2955
81.1896	30351.8	0.58063	0.783939	5.43175	0.0960338	1.8827	0.34661		591.123	10.6341	587.728	24.2412	574.657	110.842	591.123	10.6341	102.865
76.4257	39246.8	0.884464	0.79644	5.99181	0.0964838	2.92904	0.48884		593.77	16.6149	594.818	26.9793	598.824	113.266	593.77	16.6149	99.1559
215.893	93930.2	0.612753	0.81706	1.36216	0.0985455	0.976336	0.716758		605.879	5.64594	606.407	6.21938	608.36	20.5372	605.879	5.64594	99.5923
64.3413	19245	0.779462	0.819505	5.55896	0.098556	1.24758	0.224428		605.941	7.21522	607.772	25.428	614.584	117.076	605.941	7.21522	98.5937
285.784	179974	7.27163	0.853421	1.3066	0.0997038	0.795022	0.608465		612.673	4.64658	626.525	6.10897	676.848	22.1746	612.673	4.64658	90.5186
273.895	31789.1	1.57162	0.836547	3.70323	0.0997261	3.43284	0.926984		612.804	20.0677	617.238	17.1293	633.558	29.9085	612.804	20.0677	96.7241
90.3785	20752.6	0.432469	0.822838	6.07121	0.100072	1.67561	0.275992		614.832	9.82614	609.631	27.8343	590.332	126.643	614.832	9.82614	104.15
380.14	294724	4.7452	0.837358	0.95272	0.100867	0.794033	0.833438		619.489	4.68999	617.686	4.40875	611.064	11.3721	619.489	4.68999	101.379
211.324	76937.5	1.48379	0.869355	1.62682	0.103738	0.725913	0.446215		636.279	4.3982	635.217	7.68216	631.46	31.3576	636.279	4.3982	100.763
1093.83	201725	0.442105	0.88631	1.35188	0.104283	1.29219	0.955849		639.462	7.86647	644.385	6.4498	661.657	8.50915	639.462	7.86647	96.6454
33.0591	19588.7	2.18048	0.919419	5.88133	0.10437	2.47054	0.420065		639.969	15.0513	662.052	28.6131	737.985	113.029	639.969	15.0513	86.7185
155.665	79203.2	1.23558	0.884952	1.6637	0.10497	1.02893	0.61846		643.467	6.30111	643.654	7.93108	644.331	28.102	643.467	6.30111	99.8658
217.497	48862.1	1.82441	0.901163	2.68729	0.105239	1.28048	0.476495		645.039	7.85981	652.349	12.9346	677.709	50.5228	645.039	7.85981	95.1793
202.242	75395.8	0.742216	0.908716	4.16164	0.106795	3.59213	0.863153		654.106	22.3437	656.375	20.1205	664.202	45.0386	654.106	22.3437	98.48
272.754	54850.2	1.63733	0.923524	3.12675	0.107614	2.96323	0.947705		658.876	18.5595	664.222	15.2442	682.387	21.3294	658.876	18.5595	96.5545
80.6349	90490.1	1.21932	0.920216	3.74329	0.10842	2.28344	0.61001		663.563	14.3983	662.474	18.2167	658.752	63.5974	663.563	14.3983	100.73
139.743	48805.7	0.670176	0.945831	2.75104	0.109841	0.957439	0.348028		671.822	6.10846	675.929	13.5788	689.618	55.002	671.822	6.10846	97.4194
313.796	140052	1.14764	0.941776	1.29131	0.110299	0.662614	0.513133		674.482	4.24335	673.811	6.35938	671.548	23.7132	674.482	4.24335	100.437
78.3588	49612.1	1.06603	0.968715	5.26383	0.112865	3.26627	0.620513		689.363	21.3544	687.801	26.3052	682.675	88.1811	689.363	21.3544	100.98
107.026	93786.5	0.971202	1.06781	4.14712	0.114	2.14206	0.516518		695.939	14.131	737.664	21.7483	866.551	73.6654	695.939	14.131	80.3113
139.443	63070.8	0.823089	1.02438	2.27455	0.117434	1.25455	0.551562		715.777	8.49922	716.113	11.6873	717.147	40.288	715.777	8.49922	99.809
180.364	137492	0.729994	1.02101	1.83875	0.117514	0.926782	0.504027		716.238	6.28249	714.423	9.43254	708.707	33.752	716.238	6.28249	101.063
38.7444	15371.5	0.579825	1.12459	6.67439	0.122041	2.58509	0.387315		742.301	18.1256	765.169	35.8873	832.563	128.385	742.301	18.1256	89.1585
277.592	114169	6.61334	1.20229	3.8316	0.127586	1.60641	0.419252		774.082	11.7173	801.64	21.2426	879.008	72.0198	774.082	11.7173	88.0632
247.955	121569	1.91736	1.16796	1.25491	0.127861	1.11454	0.888137		775.652	8.14509	785.689	6.86478	814.31	12.0713	775.652	8.14509	95.2528
54.7561	51200.3	2.22601	1.19191	3.92666	0.130627	1.14919	0.292664		791.443	8.55907	796.846	21.684	812.004	78.5473	791.443	8.55907	97.468
210.826	112721	1.56555	1.27329	1.93289	0.138503	0.666739	0.344944		836.19	5.22875	833.86	10.9933	827.677	37.8687	836.19	5.22875	101.029
69.7717	74715.5	1.37805	1.495	3.31664	0.152882	1.64753	0.496749		917.096	14.0839	928.354	20.1816	955.166	58.8603	955.166	58.8603	96.0143
72.7484	74907.5	1.9548	1.56842	2.16537	0.159894	1.12315	0.518685		956.188	9.98089	957.802	13.4272	961.53	37.8032	961.53	37.8032	99.4445
149.099	155064	0.610594	1.64481	1.91941	0.165607	1.5316	0.797953		987.86	14.0278	987.56	12.121	986.888	23.5229	986.888	23.5229	100.098
28.3572	21227.1	1.06854	1.5882	8.55944	0.159808	1.59907	0.186819		955.709	14.2036	965.59	53.3804	988.142	171.345	988.142	171.345	96.7178
136.291	115114	1.29014	1.63488	1.52561	0.163987	1.13597	0.744602		978.894	10.3168	983.74	9.61194	994.554	20.6921	994.554	20.6921	98.4254
139.434	47565.9	0.486509	1.69008	2.37473	0.168402	1.71301	0.721347		1003.3	15.916	1004.8	15.1502	1008.03	33.3505	1008.03	33.3505	99.5304
175.151	138514	0.37818	1.78556	1.3059	0.174934	0.660464	0.505754		1039.24	6.33911	1040.21	8.49986	1042.23	22.7533	1042.23	22.7533	99.7134
62.1788	64080	1.87241	2.30783	1.70331	0.20642	0.880905	0.517173		1209.72	9.7163	1214.7	12.0671	1223.54	28.6315	1223.54	28.6315	98.8706
41.1045	54506.8	0.454465	4.05853	1.51584	0.291242	0.814472	0.537307		1647.73	11.8424	1646.01	12.3495	1643.8	23.7196	1643.8	23.7196	100.239
132.439	169309	1.24637	5.04142	1.07563	0.329671	0.951816	0.884891		1836.78	15.2128	1826.31	9.1142	1814.37	9.09835	1814.37	9.09835	101.235
33.5939	10295.4	0.470048	5.48667	2.97023	0.342001	1.81689	0.611701		1896.29	29.8487	1898.51	25.5152	1900.93	42.2362	1900.93	42.2362	99.7559
72.3989	186198	1.06344	5.56328	2.60647	0.33603	2.38998	0.916942		1867.54	38.7507	1910.43	22.4369	1957.31	18.5678	1957.31	18.5678	95.4136
35.1595	58497.3	0.499481	6.00831	2.11399	0.36127	1.54025	0.728601		1988.19	26.3512	1977.05	18.4043	1965.4	25.8275	1965.4	25.8275	101.16
33.1193	41099	1.06046	5.7264	2.10009	0.338525	1.57733	0.751078		1879.57	25.7163	1935.36	18.1557	1995.61	24.6443	1995.61	24.6443	94.185
313.792	445861	2.17869	6.33576	0.782746	0.369166	0.73675	0.941238		2025.48	12.8057	2023.42	6.86453	2021.3	4.6852	2021.3	4.6852	100.207
224.034	441133	15.4391	6.56808	0.767621	0.378258	0.72893	0.949596		2068.14	12.8962	2055.07	6.7645	2041.98	4.25445	2041.98	4.25445	101.281
59.8961	31553.1	2.21279	6.86776	2.25586	0.381115	2.06931	0.917302		2081.49	36.8107	2094.51	19.9969	2107.31	15.7625	2107.31	15.7625	98.7748
25.5418	37979.7	0.994253	7.22013	2.14817	0.394089	1.04594	0.4869		2141.76	19.0603	2138.99	19.1609	2136.32	32.8212	2136.32	32.8212	100.255
39.781	48480	1.11524	5.92106	8.62229	0.320041	6.39045	0.741155		1789.93	99.8855	1964.33	75.0359	2153.39	101.144	2153.39	101.144	83.1216
44.5427	175736	1.68275	7.58829	1.85615	0.406633	1.28052	0.68988		2199.51	23.8632	2183.48	16.654	2168.44	23.4185	2168.44	23.4185	101.433
376.878	136029	1.06688	6.4694	2.63551	0.345796	2.607	0.989184		1914.49	43.1824	2041.75	23.1818	2172.87	6.73499	2172.87	6.73499	88.109
93.0732	184148	1.15068	7.46811	3.54012	0.389943	3.39802	0.959859		2122.57	61.4555	2169.17	31.7112	2213.55	17.2205	2213.55	17.2205	95.8898
621.19	323019	1.27146	10.3676	1.27787	0.454285	1.24257	0.972376		2414.27	25.0219	2468.16	11.8344	2512.82	5.0124	2512.82	5.0124	96.0782
34.5607	57468.3	1.082	11.6578	1.61778	0.48719	1.31065	0.810151		2558.51	27.6782	2577.32	15.13	2592.14	15.8196	2592.14	15.8196	98.7024
57.2251	162783	2.14812	12.0102	1.05991	0.497483	0.842541	0.79492		2602.97	18.0437	2605.2	9.93522	2606.92	10.7105	2606.92	10.7105	99.8484
62.5103	99374.2	0.712814	11.9737	3.4569	0.494997	3.37804	0.977189		2592.26	72.1047	2602.35	32.4062	2610.2	12.2273	2610.2	12.2273	99.3127
49.3433	91003.3	1.09213	12.0223	1.28907	0.49475	1.01753	0.789353		2591.2	21.7113	2606.14	12.0844	2617.77	13.1713	2617.77	13.1713	98.985
189.173	413477	1.35062	30.1167	1.80778	0.713406	1.20615	0.667201		3471.29	32.3743	3490.63	17.7678	3501.74	20.8151	3501.74	20.8151	99.1303
Sample 4TR
182.918	9414.14	1.10174	0.0866827	12.8252	0.0119354	3.451	0.269079		76.485	2.6239	84.4085	10.3882	314.774	281.909	76.485	2.6239	NA
405.163	16315.5	1.08732	0.0779078	4.4397	0.0122898	1.06918	0.240823		78.7422	0.836777	76.176	3.25825	-3.59592	103.978	78.7422	0.836777	NA
277.003	34118.2	1.28082	0.0801745	9.27375	0.0123154	2.50139	0.269728		78.9053	1.9617	78.309	6.98931	60.1689	213.179	78.9053	1.9617	NA
442.526	12153.4	1.76092	0.0784296	3.50601	0.0123246	1.52873	0.43603		78.9638	1.19978	76.6674	2.589	5.67316	75.9647	78.9638	1.19978	NA
141.867	7582.85	1.35834	0.0761517	27.969	0.0127195	2.94454	0.105279		81.478	2.38405	74.5204	20.0988	-143.338	700.635	81.478	2.38405	NA
189.374	9299.05	2.39052	0.0814093	8.94468	0.0127486	4.23771	0.473769		81.6636	3.43884	79.469	6.83731	13.979	189.605	81.6636	3.43884	NA
237.597	13720	1.9178	0.0789316	15.3263	0.0127766	2.23499	0.145827		81.8416	1.81759	77.14	11.3853	-66.1794	371.925	81.8416	1.81759	NA
221.069	6121.19	1.72753	0.0773825	18.7998	0.0127868	1.81114	0.0963378		81.9066	1.47405	75.681	13.7114	-116.761	464.658	81.9066	1.47405	NA
30.8684	9728.58	158.721	0.365919	15.1936	0.0553431	4.02469	0.264895		347.242	13.6057	316.624	41.3513	96.9489	348.338	347.242	13.6057	NA
596.598	234534	64.5656	0.409127	1.41481	0.0555728	1.32805	0.938677		348.645	4.50719	348.246	4.17097	345.563	11.0131	348.645	4.50719	NA
63.6159	10968.8	3.34804	0.474419	7.05244	0.0672241	1.16057	0.164562		419.41	4.71257	394.237	23.0454	249.141	160.274	419.41	4.71257	168.342
160.438	13091	1.14645	0.525678	3.64552	0.0679345	1.97133	0.540754		423.699	8.08395	428.937	12.7547	457.153	68.0429	423.699	8.08395	92.6823
110.661	39835.4	5.09371	0.558221	8.45513	0.0683674	7.393	0.87438		426.313	30.498	450.368	30.7652	575.13	89.2354	426.313	30.498	74.1246
109.158	62688.6	1.71446	0.541923	4.14123	0.0701404	2.13685	0.515995		437.002	9.02861	439.691	14.7797	453.819	78.7714	437.002	9.02861	96.2943
162.02	39987.5	3.3264	0.554728	2.13865	0.0709719	1.56849	0.733399		442.008	6.7005	448.089	7.74826	479.403	32.1389	442.008	6.7005	92.1998
152.864	43470.3	1.55441	0.556856	2.45376	0.0713088	1.64586	0.670749		444.036	7.06218	449.478	8.91185	477.398	40.2356	444.036	7.06218	93.0117
180.95	14899.4	4.21317	0.565266	3.2088	0.0717656	1.1731	0.36559		446.784	5.06374	454.948	11.7668	496.418	65.8238	446.784	5.06374	90.0015
164.916	24751.7	1.94367	0.547711	2.60176	0.0718508	1.06823	0.410582		447.297	4.61617	443.496	9.34913	423.805	52.9409	447.297	4.61617	105.543
193.752	41189	5.07252	0.560755	2.92695	0.0722621	1.18746	0.405697		449.77	5.15876	452.018	10.6782	463.489	59.2927	449.77	5.15876	97.0399
291.277	100880	3.121	0.573815	1.93623	0.0725343	0.848153	0.438043		451.406	3.69764	460.479	7.16824	506.016	38.276	451.406	3.69764	89.2079
140.276	77058.5	0.904891	0.570613	2.94777	0.07266	0.928032	0.314825		452.162	4.05242	458.411	10.8746	489.876	61.7305	452.162	4.05242	92.3012
189.111	75095.4	1.76842	0.566183	3.34753	0.0728426	2.08087	0.621613		453.258	9.10779	455.543	12.2883	467.105	58.0806	453.258	9.10779	97.0357
199.655	37541.3	5.2839	0.566326	3.26352	0.0729127	1.48563	0.455225		453.68	6.50833	455.636	11.9818	465.512	64.4022	453.68	6.50833	97.4582
211.469	165754	3.18776	0.578703	3.20427	0.0731971	2.0064	0.626166		455.388	8.82168	463.628	11.9271	504.671	55.0012	455.388	8.82168	90.2347
208.872	40743.5	2.59182	0.571724	2.6847	0.0731982	1.25457	0.467305		455.395	5.51614	459.129	9.9163	477.835	52.4946	455.395	5.51614	95.3039
110.063	56046.8	2.23028	0.545906	4.66925	0.0734049	0.928178	0.198785		456.637	4.09177	442.311	16.7437	368.422	103.152	456.637	4.09177	123.944
99.9473	27411.8	1.29484	0.566375	4.27369	0.073954	1.27192	0.297617		459.933	5.64618	455.668	15.6919	434.188	90.9278	459.933	5.64618	105.929
81.5721	40121.5	1.65651	0.567828	3.30618	0.0740596	1.48929	0.450457		460.567	6.61991	456.609	12.159	436.716	65.7342	460.567	6.61991	105.461
118.384	31274.5	3.46764	0.575761	3.28365	0.0741225	1.50926	0.459629		460.945	6.71397	461.733	12.1832	465.661	64.6332	460.945	6.71397	98.9872
176.643	29248	2.16513	0.567491	2.57384	0.0743061	1.57647	0.6125		462.046	7.02912	456.391	9.46188	427.99	45.3894	462.046	7.02912	107.957
85.1853	13912.8	1.80242	0.571011	4.22245	0.0745196	1.8414	0.436098		463.328	8.23233	458.668	15.5845	435.374	84.6249	463.328	8.23233	106.421
146.632	75873.2	1.98785	0.571261	4.37618	0.0745619	1.74493	0.398734		463.581	7.80517	458.83	16.1565	435.086	89.3878	463.581	7.80517	106.549
136.005	58208.4	2.12579	0.57735	2.32052	0.0745642	1.22559	0.528154		463.595	5.48229	462.757	8.62455	458.604	43.7065	463.595	5.48229	101.088
306.05	51999.2	7.73981	0.588818	1.82529	0.0746385	1.44275	0.79042		464.041	6.45966	470.113	6.86873	499.89	24.616	464.041	6.45966	92.8286
576.244	287024	10.1032	0.578906	1.56314	0.0746485	1.34886	0.862917		464.101	6.04002	463.758	5.81946	462.039	17.5093	464.101	6.04002	100.446
388.625	125817	1.55468	0.59937	2.20182	0.0747227	1.89327	0.859866		464.546	8.48567	476.834	8.37851	536.387	24.592	464.546	8.48567	86.6064
448.965	76225.8	1.57828	0.588258	2.47159	0.0752228	2.21324	0.895471		467.545	9.98155	469.755	9.29534	480.544	24.3061	467.545	9.98155	97.2949
177.037	61833.8	1.92083	0.582279	2.56524	0.0754797	1.12566	0.438812		469.085	5.09275	465.925	9.58559	450.363	51.2215	469.085	5.09275	104.157
126.222	27432	2.55498	0.590147	3.07259	0.0758817	1.33665	0.435025		471.494	6.07727	470.962	11.5791	468.348	61.2883	471.494	6.07727	100.672
172.349	84115	2.19719	0.594539	2.19296	0.0762312	1.41489	0.645198		473.588	6.46053	473.762	8.30261	474.617	37.0791	473.588	6.46053	99.7832
229.89	35342.8	9.64584	0.610926	2.42441	0.0768675	1.22146	0.503815		477.398	5.62052	484.144	9.33602	516.189	45.9732	477.398	5.62052	92.4851
47.3211	14013	8.04969	0.657448	8.62397	0.079323	5.2286	0.606287		492.08	24.7716	513.052	34.7479	607.59	148.433	492.08	24.7716	80.9888
137.838	68141.1	1.28782	0.645618	2.79112	0.0817267	1.15724	0.414616		506.421	5.63622	505.779	11.1192	502.873	55.9324	506.421	5.63622	100.705
171.695	60980.2	0.655608	0.690483	3.64133	0.0851202	3.28578	0.902356		526.612	16.6154	533.091	15.103	560.914	34.2051	526.612	16.6154	93.8847
564.031	102899	1.29776	0.684523	1.15986	0.0851509	0.987573	0.851458		526.795	4.99559	529.505	4.78575	541.202	13.287	526.795	4.99559	97.338
139.647	58762.9	2.23972	0.696788	2.74507	0.0861834	1.40942	0.513435		532.926	7.20905	536.871	11.4466	553.686	51.3862	532.926	7.20905	96.2505
191.935	73546.1	3.85787	0.734203	2.67072	0.0870117	2.12558	0.795883		537.84	10.9683	559.017	11.4813	646.22	34.7425	537.84	10.9683	83.2286
135.477	43884.5	3.50814	0.714427	3.24407	0.0870491	2.18884	0.674723		538.061	11.2992	547.372	13.7273	586.339	51.9675	538.061	11.2992	91.7662
175.626	80360.4	1.86936	0.704531	1.67269	0.0870953	0.936762	0.560032		538.335	4.8381	541.493	7.02018	554.794	30.2549	538.335	4.8381	97.0334
170.994	65962.8	1.69431	0.71117	3.80376	0.0891241	3.0155	0.792769		550.355	15.9073	545.441	16.0531	524.94	50.8295	550.355	15.9073	104.841
237.976	71169.3	2.13897	0.755451	1.84194	0.0924367	1.52838	0.829768		569.932	8.33679	571.382	8.04882	577.175	22.3629	569.932	8.33679	98.7451
305.323	132041	1.6287	0.760875	2.05406	0.0929334	1.87202	0.911373		572.862	10.2614	574.515	9.01239	581.049	18.3626	572.862	10.2614	98.5909
61.3583	28222.2	0.464867	0.804075	4.32846	0.0969027	1.4245	0.3291		596.232	8.11237	599.125	19.5911	610.068	88.3784	596.232	8.11237	97.7321
202.557	73042.5	1.64675	0.813134	1.56817	0.0975014	0.708099	0.451544		599.749	4.05525	604.211	7.14106	620.961	30.1885	599.749	4.05525	96.584
239.462	133601	2.54755	0.815597	1.87614	0.0982236	1.19999	0.639603		603.99	6.91863	605.589	8.55781	611.557	31.1755	603.99	6.91863	98.7627
215.434	61996.5	3.29874	0.811026	4.10537	0.0982251	3.43622	0.837005		603.999	19.8122	603.029	18.6699	599.39	48.6653	603.999	19.8122	100.769
364.386	168299	1.0655	0.824455	1.36986	0.0990952	1.03745	0.757342		609.104	6.02983	610.531	6.28559	615.807	19.3375	609.104	6.02983	98.9116
193.759	96985.8	12.3539	0.835298	1.90685	0.0998113	0.787165	0.412809		613.303	4.60517	616.548	8.81236	628.461	37.4395	613.303	4.60517	97.588
47.3193	22719	0.853351	0.839537	4.43944	0.100706	0.897318	0.202124		618.544	5.29234	618.89	20.5754	620.134	93.8568	618.544	5.29234	99.7435
401.824	104985	39.4313	0.858453	1.07807	0.101886	0.987633	0.916111		625.449	5.88694	629.278	5.05645	643.082	9.28491	625.449	5.88694	97.2581
94.3279	86453.7	3.83505	0.878528	5.41737	0.104899	0.66247	0.122286		643.055	4.05446	640.187	25.7306	630.103	115.904	643.055	4.05446	102.056
1062.73	455041	2.04294	0.88914	1.28601	0.105519	1.21986	0.948563		646.669	7.50571	645.907	6.1459	643.266	8.7301	646.669	7.50571	100.529
352.054	97937.6	0.95797	0.917605	1.4437	0.107461	1.12323	0.778022		657.986	7.026	661.093	7.0147	671.725	19.4055	657.986	7.026	97.9546
221.578	90464.6	0.819227	0.970253	2.04777	0.111939	1.45566	0.710851		684.002	9.44669	688.594	10.2397	703.63	30.6706	684.002	9.44669	97.2104
212.875	73419	2.0432	0.990778	1.67801	0.114624	1.41769	0.844862		699.544	9.39822	699.117	8.47986	697.758	19.1232	699.544	9.39822	100.256
101.159	8660.84	1.31396	1.0313	3.29416	0.117799	2.01904	0.612916		717.883	13.7165	719.576	16.9834	724.838	55.2091	717.883	13.7165	99.0405
186.944	129402	1.96617	1.11242	2.0664	0.123145	1.82708	0.884186		748.642	12.9139	759.338	11.0497	790.943	20.2758	748.642	12.9139	94.6518
147.98	80337.1	3.95726	1.1781	1.62896	0.1312	0.759728	0.466389		794.709	5.6803	790.428	8.94655	778.351	30.2978	794.709	5.6803	102.102
297.278	130204	3.3477	1.32176	2.14504	0.135555	2.05192	0.956588		819.48	15.7902	855.284	12.4	949.306	12.8038	819.48	15.7902	86.3241
415.355	49408.5	1.72881	1.44234	1.11819	0.148236	0.931172	0.832746		891.068	7.74945	906.693	6.70525	944.968	12.6605	944.968	12.6605	94.2961
121.097	44875	1.05276	1.60353	1.98907	0.162578	1.63442	0.821703		971.089	14.7341	971.587	12.4399	972.734	23.1196	972.734	23.1196	99.8309
112.808	86028	1.4956	1.62591	1.87241	0.163615	1.52016	0.811874		976.834	13.7791	980.277	11.7725	988.017	22.2231	988.017	22.2231	98.8681
95.0454	79750	0.659222	1.67362	1.46348	0.166117	1.05216	0.718944		990.683	9.66216	998.563	9.30225	1015.89	20.6036	1015.89	20.6036	97.5189
272.71	353197	5.49143	3.90809	3.11104	0.259064	2.99139	0.961539		1485.05	39.6786	1615.36	25.1581	1789.59	15.5661	1789.59	15.5661	82.9826
244.448	42803.6	6.12232	4.42119	1.88246	0.275779	1.57328	0.835757		1570.07	21.9236	1716.32	15.5896	1899.68	18.5805	1899.68	18.5805	82.6492
76.0694	53366.3	1.74273	4.81297	1.22792	0.299871	1.01457	0.826256		1690.67	15.0882	1787.17	10.3236	1901.74	12.4294	1901.74	12.4294	88.9012
85.3392	88997	0.689295	5.09836	3.69708	0.311241	3.66235	0.990607		1746.81	56.0407	1835.83	31.3939	1938.3	9.0463	1938.3	9.0463	90.1206
298.368	453319	2.05456	9.4232	1.72875	0.420499	1.30904	0.757215		2262.74	24.9802	2380.09	15.8707	2482.13	19.0416	2482.13	19.0416	91.1614
180.545	335052	3.10334	10.2574	2.02981	0.457292	2.01961	0.994973		2427.59	40.8543	2458.27	18.7817	2483.73	3.42786	2483.73	3.42786	97.7395
43.006	172639	1.17066	11.0821	1.36661	0.482581	0.760124	0.55621		2538.5	15.9498	2530.06	12.7285	2523.28	19.0737	2523.28	19.0737	100.603
466.264	609865	1.01621	12.2563	1.40047	0.496702	1.39807	0.998284		2599.61	29.9096	2624.23	13.1482	2643.26	1.35845	2643.26	1.35845	98.3487
Sample 5PS
172.373	11517.6	0.59884	0.40229	4.67461	0.0537543	1.26116	0.26979		337.53	4.14729	343.308	13.6177	382.586	101.201	337.53	4.14729	NA
321.839	70410.3	8.22812	0.433573	4.13788	0.0574711	3.08716	0.746072		360.227	10.8158	365.711	12.7079	400.603	61.7381	360.227	10.8158	NA
205.11	6911.52	0.542357	0.591584	23.4392	0.0630898	5.13333	0.219006		394.389	19.6385	471.878	88.6875	868.759	479.953	394.389	19.6385	NA
82.468	8352.01	0.785309	0.516866	6.89024	0.0639785	1.62524	0.235876		399.775	6.29994	423.056	23.8438	551.972	146.316	399.775	6.29994	NA
253.081	83592	6.82608	0.508272	2.60409	0.0659788	0.849488	0.326213		411.883	3.38947	417.286	8.91073	447.245	54.7194	411.883	3.38947	92.0934
625.381	1241.56	1.97157	0.594003	4.50815	0.066401	3.6369	0.806738		414.436	14.5984	473.421	17.0596	770.439	56.0799	414.436	14.5984	53.7922
129.776	38771.2	4.07783	0.526157	5.06635	0.0701119	1.27655	0.251966		436.83	5.39161	429.256	17.7372	388.779	110.128	436.83	5.39161	112.359
1107.21	4768.1	5.67266	0.555042	1.75861	0.0701464	1.09726	0.623937		437.037	4.6365	448.294	6.37365	506.456	30.241	437.037	4.6365	86.2933
111.191	8222.5	4.38921	0.558158	3.76756	0.070763	1.3738	0.36464		440.751	5.85268	450.327	13.7045	499.545	77.2879	440.751	5.85268	88.2305
300.104	54296.2	7.80191	0.548625	2.06234	0.0707726	0.854494	0.414332		440.809	3.64078	444.096	7.41869	461.141	41.6272	440.809	3.64078	95.5907
200.634	27940.6	2.33181	0.565169	3.16971	0.0714038	1.10369	0.348199		444.607	4.74168	454.885	11.6221	507.136	65.3654	444.607	4.74168	87.6703
533.501	46906.6	4.78609	0.562529	3.81149	0.0714265	3.6361	0.953983		444.744	15.6261	453.171	13.9338	496.156	25.1647	444.744	15.6261	89.638
510.477	106744	8.04843	0.56009	2.96165	0.0714465	2.57005	0.867775		444.864	11.0477	451.585	10.7966	485.962	32.4909	444.864	11.0477	91.543
113.209	12381.9	1.42022	0.580146	5.02749	0.0725561	1.43293	0.285019		451.537	6.24882	464.555	18.7444	529.451	105.661	451.537	6.24882	85.2841
167.331	52126	4.59693	0.552392	2.94154	0.0727143	1.04004	0.353569		452.488	4.54468	446.562	10.6284	416.132	61.4736	452.488	4.54468	108.736
344.37	54827.3	0.972583	0.559585	2.5433	0.0730064	1.11981	0.440297		454.243	4.91156	451.256	9.26609	436.046	50.8615	454.243	4.91156	104.173
42.7815	12565.1	0.521258	0.573276	15.0381	0.0730508	2.65382	0.176473		454.51	11.6465	460.131	55.695	488.318	328.245	454.51	11.6465	93.0766
275.617	84314.9	7.19722	0.574514	2.72394	0.073445	0.60099	0.220632		456.877	2.65074	460.93	10.0924	481.156	58.7236	456.877	2.65074	94.9541
87.7887	17443.8	0.759832	0.58155	8.21464	0.0734557	0.982163	0.119563		456.941	4.33255	465.457	30.68	507.71	179.643	456.941	4.33255	90.0004
164.336	45960.3	14.2125	0.567391	2.23815	0.073606	0.709623	0.317057		457.844	3.13627	456.326	8.22687	448.668	47.1762	457.844	3.13627	102.045
444.034	79015.5	8.70273	0.577429	1.48998	0.0738099	0.991983	0.66577		459.068	4.39552	462.808	5.53813	481.388	24.5653	459.068	4.39552	95.3635
153.786	32507.7	3.18884	0.59593	4.24739	0.073946	0.884385	0.208218		459.885	3.92547	474.648	16.1054	546.623	90.8094	459.885	3.92547	84.1321
205.261	46132.5	3.56685	0.588799	3.64685	0.0739813	1.7925	0.491521		460.097	7.95982	470.1	13.7237	519.215	69.7442	460.097	7.95982	88.614
217.498	37809.7	5.75878	0.588091	4.59333	0.073992	1.93965	0.422276		460.161	8.61442	469.648	17.273	516.258	91.4694	460.161	8.61442	89.1339
142.215	39458.1	0.402139	0.571886	3.05443	0.0741376	1.43386	0.469437		461.036	6.37976	459.234	11.2841	450.209	59.9325	461.036	6.37976	102.405
160.045	89674.3	1.9451	0.568032	4.36873	0.0741626	1.26808	0.290264		461.185	5.64393	456.741	16.0709	434.421	93.1523	461.185	5.64393	106.161
271.948	134523	10.5402	0.58396	1.6706	0.0742939	0.740343	0.443161		461.973	3.30051	467.003	6.25382	491.828	33.0268	461.973	3.30051	93.9298
376.251	265629	10.616	0.58106	1.56836	0.0743283	1.4113	0.899854		462.18	6.29439	465.143	5.85266	479.772	15.1059	462.18	6.29439	96.3332
69.4717	30916.6	0.940998	0.547086	11.7065	0.0743429	2.01199	0.17187		462.267	8.97513	443.086	42.0576	344.671	261.685	462.267	8.97513	134.118
245.946	24149.5	12.5294	0.578397	3.59962	0.074373	2.30709	0.640926		462.448	10.2954	463.431	13.3944	468.289	61.2103	462.448	10.2954	98.7528
799.08	102090	5.69804	0.577687	1.43369	0.0744617	1.24764	0.870227		462.98	5.57376	462.974	5.33041	462.963	15.6533	462.98	5.57376	100.004
140.539	54535.5	3.68678	0.571446	5.76742	0.0744769	2.87376	0.498274		463.071	12.8408	458.949	21.2986	438.345	111.341	463.071	12.8408	105.641
361.53	331943	8.78755	0.57441	2.25778	0.0745015	1.4387	0.63722		463.219	6.43054	460.863	8.36424	449.117	38.6569	463.219	6.43054	103.14
259.44	46646.4	4.68417	0.575374	3.20035	0.0745709	1.57641	0.492576		463.635	7.05217	461.484	11.869	450.773	61.8654	463.635	7.05217	102.853
188.419	78487.7	3.73994	0.589768	4.60016	0.0746534	1.99409	0.433483		464.13	8.92988	470.719	17.3298	502.975	91.281	464.13	8.92988	92.277
198.498	38988.6	0.605781	0.60167	3.10292	0.0747144	1.26713	0.408369		464.496	5.67874	478.293	11.836	545.007	61.8852	464.496	5.67874	85.2275
311.807	85498.6	3.44801	0.5798	1.94495	0.0747822	1.18674	0.610164		464.903	5.32295	464.333	7.24808	461.493	34.173	464.903	5.32295	100.739
234.676	74445.5	4.87944	0.576684	2.27808	0.0747932	1.09843	0.482172		464.969	4.92751	462.328	8.46063	449.209	44.3549	464.969	4.92751	103.508
471.512	133035	12.6202	0.577789	2.15644	0.0748697	1.78476	0.827643		465.427	8.01398	463.04	8.01855	451.192	26.8779	465.427	8.01398	103.155
82.0625	23030.8	2.1046	0.579271	6.50915	0.0748913	2.78758	0.428255		465.557	12.5202	463.993	24.2472	456.262	130.6	465.557	12.5202	102.037
163.022	25032.2	1.29014	0.596971	4.46507	0.074896	2.83144	0.63413		465.585	12.718	475.31	16.9494	522.501	75.7562	465.585	12.718	89.107
138.789	30934.6	2.59238	0.578757	3.81813	0.0749301	1.176	0.308003		465.79	5.28445	463.662	14.2131	453.118	80.6763	465.79	5.28445	102.797
92.4846	27190.2	2.55272	0.572093	3.93322	0.07521	2.01364	0.511956		467.468	9.07991	459.367	14.5344	419.03	75.492	467.468	9.07991	111.56
75.4603	25429.7	1.16006	0.619725	8.54368	0.0752501	1.81138	0.212014		467.709	8.17194	489.675	33.2038	593.816	181.247	467.709	8.17194	78.7633
278.963	37864.8	2.07925	0.590013	2.48107	0.0757404	1.3488	0.543638		470.647	6.12192	470.876	9.3485	472.012	46.0825	470.647	6.12192	99.7109
180.373	134754	5.08674	0.59147	4.73619	0.075864	1.43677	0.303359		471.388	6.53105	471.806	17.8747	473.818	99.8743	471.388	6.53105	99.4872
227.331	131340	2.22672	0.589237	3.08979	0.0761888	1.4002	0.45317		473.334	6.39014	470.38	11.6327	455.997	61.1244	473.334	6.39014	103.802
206.929	73488.4	10.9858	0.594875	3.89169	0.0762236	2.21369	0.568825		473.542	10.107	473.976	14.74	476.074	70.7911	473.542	10.107	99.4681
169.121	47827.8	2.74287	0.584425	3.30681	0.0766549	2.03882	0.616553		476.125	9.35754	467.301	12.3856	424.158	58.118	476.125	9.35754	112.252
92.8542	33001.8	1.70237	0.620799	5.99346	0.0767927	1.61401	0.269296		476.95	7.42016	490.348	23.3134	553.442	126.049	476.95	7.42016	86.1789
94.8264	31271.5	4.64927	0.608128	7.05949	0.0773548	3.97689	0.56334		480.315	18.4074	482.379	27.1132	492.222	128.713	480.315	18.4074	97.5808
359.743	45756.4	2.30184	0.82032	6.02634	0.0806122	4.6077	0.764593		499.776	22.1582	608.227	27.582	1036.1	78.4764	499.776	22.1582	48.2363
210.551	73444.3	4.46591	0.652158	3.65695	0.0811764	2.7111	0.741354		503.141	13.1219	509.806	14.6582	539.831	53.6893	503.141	13.1219	93.2033
66.3705	31033.5	1.49931	0.728126	7.00977	0.0856742	2.34758	0.3349		529.903	11.9423	555.453	29.9979	661.588	141.685	529.903	11.9423	80.0956
263.497	46545.3	2.08993	0.68582	2.4356	0.0861108	0.626835	0.257364		532.495	3.20373	530.286	10.0612	520.769	51.6374	532.495	3.20373	102.252
62.9514	38381.6	2.89054	0.670822	3.64479	0.0865231	1.09933	0.301616		534.941	5.64338	521.212	14.8597	461.472	77.0545	534.941	5.64338	115.921
251.685	80512.4	1.99044	0.706775	1.64952	0.0873493	0.711425	0.431292		539.842	3.68415	542.83	6.93583	555.375	32.4861	539.842	3.68415	97.203
425.351	137943	1.16241	0.701212	1.33619	0.0873716	0.872201	0.652755		539.974	4.5178	539.514	5.59232	537.553	22.1628	539.974	4.5178	100.45
52.4732	2858.97	0.949931	0.753946	10.2042	0.0874208	5.46761	0.535822		540.265	28.3358	570.511	44.5666	692.931	184.012	540.265	28.3358	77.9682
122.581	40290.7	1.12425	0.72762	5.76286	0.0889139	2.90774	0.504565		549.11	15.3056	555.155	24.6496	580.003	108.135	549.11	15.3056	94.6737
144.954	71987.5	2.2557	0.738044	1.99393	0.0893702	1.05745	0.530337		551.811	5.59238	561.263	8.59748	599.75	36.6229	551.811	5.59238	92.0069
773.654	386490	2.58578	0.720149	1.05914	0.0895798	0.953025	0.89981		553.052	5.05096	550.755	4.50239	541.265	10.088	553.052	5.05096	102.178
112.955	36770.5	1.68438	0.730468	4.62953	0.0912574	3.13015	0.676126		562.969	16.8743	556.828	19.8454	531.819	74.7049	562.969	16.8743	105.857
85.6872	30802.5	1.93911	0.757552	6.65612	0.0916787	2.28704	0.343599		565.457	12.3813	572.597	29.139	601.022	135.431	565.457	12.3813	94.0827
175.006	54700.1	1.26665	0.772948	3.24947	0.0936618	2.00253	0.616262		577.157	11.0555	581.453	14.3855	598.265	55.4198	577.157	11.0555	96.4718
186.837	74639.1	2.70604	0.780241	2.31616	0.0938034	1.58915	0.686115		577.992	8.78544	585.621	10.3078	615.289	36.3878	577.992	8.78544	93.9382
97.285	38287	1.33564	0.776691	3.23234	0.0961438	1.43606	0.444278		591.77	8.11977	583.594	14.3487	551.886	63.2166	591.77	8.11977	107.227
117.79	55304.5	1.36602	0.844703	4.2209	0.0998699	2.51326	0.595432		613.646	14.7112	621.738	19.6276	651.278	72.7992	613.646	14.7112	94.2219
174.831	53516.6	2.07615	0.871851	2.38516	0.102389	1.70459	0.714665		628.393	10.206	636.572	11.2807	665.721	35.7295	628.393	10.206	94.3929
69.3018	28706.7	1.24535	0.890689	3.83893	0.102437	1.89863	0.494574		628.677	11.3727	646.739	18.3651	710.333	70.9303	628.677	11.3727	88.5046
313.71	115896	1.29018	0.855871	3.44593	0.102625	3.31591	0.962267		629.775	19.8952	627.867	16.1374	620.979	20.2515	629.775	19.8952	101.416
268.733	73098.6	0.451678	0.86702	1.82722	0.103252	1.12027	0.613103		633.441	6.75877	633.948	8.61611	635.777	31.0676	633.441	6.75877	99.6326
626.73	1593.27	0.906483	0.918408	4.34834	0.103694	1.30056	0.299093		636.021	7.87686	661.518	21.1403	749.402	87.6855	636.021	7.87686	84.8705
151.938	82408.4	0.496279	0.911938	2.34269	0.107636	1.75607	0.749595		659.002	11.0007	658.087	11.3463	654.932	33.2883	659.002	11.0007	100.622
121.591	74733.5	0.755757	0.915387	3.9986	0.10843	1.71716	0.429441		663.624	10.8286	659.917	19.4061	647.29	77.5839	663.624	10.8286	102.523
141.811	42910.4	1.75321	0.994405	3.31144	0.112886	2.10231	0.634862		689.485	13.7468	700.965	16.7662	737.924	54.1349	689.485	13.7468	93.4357
68.8046	41620.9	1.13406	0.973071	8.8583	0.113439	1.4367	0.162187		692.689	9.43584	690.046	44.3873	681.42	187.033	692.689	9.43584	101.654
355.702	4528.12	1.38121	1.04294	3.87855	0.118131	3.03755	0.783166		719.797	20.6878	725.379	20.1076	742.654	51.0006	719.797	20.6878	96.9223
252.535	205170	1.33452	1.21371	2.71525	0.134157	2.49428	0.918619		811.535	19.0197	806.895	15.117	794.092	22.5228	811.535	19.0197	102.197
68.0229	76568.6	1.73056	1.65652	3.49277	0.16511	2.15984	0.618374		985.114	19.7309	992.046	22.1183	1007.39	55.7046	1007.39	55.7046	97.7889
73.0202	48954.6	1.17639	1.61869	3.51178	0.159151	1.69302	0.482099		952.058	14.9848	977.485	22.0447	1035.04	62.1575	1035.04	62.1575	91.9825
142.314	78093.5	2.97431	2.44406	9.76054	0.202736	4.33458	0.444092		1190	47.1014	1255.68	70.4435	1370.06	168.597	1370.06	168.597	86.858
79.5883	79183.7	1.25384	4.60722	1.3471	0.309095	1.03194	0.766048		1736.25	15.707	1750.58	11.2393	1767.71	15.8163	1767.71	15.8163	98.2205
728.092	908843	5.57167	9.08519	2.11145	0.424343	2.06686	0.978883		2280.17	39.6952	2346.62	19.3158	2404.89	7.33678	2404.89	7.33678	94.8139
90.7383	141225	1.10196	8.65757	4.68575	0.403984	4.46204	0.952258		2187.36	82.771	2302.63	42.6769	2406.51	24.3078	2406.51	24.3078	90.8935
40.7217	99110	0.977758	12.339	3.82751	0.492988	3.76745	0.98431		2583.59	80.1989	2630.55	35.9653	2666.87	11.1873	2666.87	11.1873	96.8773
64.1962	103088	1.2277	16.2672	1.76288	0.566033	1.69537	0.961703		2891.51	39.5028	2892.63	16.8649	2893.4	7.84067	2893.4	7.84067	99.9346
Sample 6PSR
707.21	44012.5	0.964007	0.0924604	6.53137	0.0142469	1.87604	0.287236		91.1936	1.69879	89.7927	5.61292	52.7363	149.427	91.1936	1.69879	NA
190.64	25975.5	1.56232	0.498434	4.21203	0.0647716	0.995782	0.236414		404.579	3.90491	410.642	14.2272	444.846	91.017	404.579	3.90491	90.9482
99.7242	21134.7	1.11401	0.507335	5.33142	0.0651977	1.38059	0.258954		407.158	5.44736	416.655	18.2223	469.579	114.082	407.158	5.44736	86.7071
133.409	8812.14	1.85334	0.514616	5.41735	0.0676951	4.27646	0.7894		422.254	17.4789	421.548	18.6916	417.666	74.3204	422.254	17.4789	101.099
135.456	5973.84	1.53068	0.528283	4.8923	0.0682706	2.03012	0.414963		425.728	8.3636	430.67	17.173	457.169	98.8031	425.728	8.3636	93.1228
491.139	37383.7	1.20069	0.529453	1.67514	0.0687469	1.17673	0.702468		428.602	4.87947	431.447	5.88811	446.646	26.5033	428.602	4.87947	95.96
226.094	16249.3	1.76608	0.542091	3.99587	0.0696933	1.33814	0.33488		434.308	5.62019	439.802	14.2637	468.66	83.3984	434.308	5.62019	92.6701
143.125	6572.34	1.25263	0.568208	8.45677	0.0698971	4.60261	0.544251		435.536	19.3839	456.855	31.1225	565.544	154.672	435.536	19.3839	77.0118
401.078	97631	6.39976	0.544871	1.50375	0.0702959	0.786248	0.52286		437.938	3.32893	441.631	5.3853	460.899	28.423	437.938	3.32893	95.0182
399.925	97243.4	2.40888	0.545945	2.86508	0.0708025	1.94042	0.677266		440.988	8.27092	442.337	10.2739	449.337	46.8311	440.988	8.27092	98.1421
147.267	10441	1.94052	0.556559	5.49006	0.0712007	2.45397	0.446985		443.386	10.5148	449.285	19.9346	479.571	108.596	443.386	10.5148	92.4546
453.526	74830.7	1.9557	0.557798	2.86133	0.0716467	2.19785	0.768122		446.069	9.47242	450.092	10.4035	470.72	40.5738	446.069	9.47242	94.763
241.926	59663.7	2.3462	0.546348	3.45776	0.0717266	1.62611	0.470278		446.55	7.0156	442.601	12.4053	422.1	68.123	446.55	7.0156	105.792
121.722	132424	6.2812	0.556828	5.5082	0.0721783	1.76175	0.319842		449.266	7.64545	449.46	20.0067	450.43	116.002	449.266	7.64545	99.7415
535.348	166169	2.86477	0.567288	1.34519	0.0724646	0.837305	0.622443		450.987	3.64708	456.259	4.94393	482.921	23.2414	450.987	3.64708	93.3873
211.702	122963	7.57045	0.563941	3.72538	0.0724964	2.66939	0.716541		451.178	11.6319	454.088	13.6408	468.841	57.5617	451.178	11.6319	96.2327
156.066	23603	0.434067	0.5681	5.08213	0.0725877	1.0246	0.201609		451.727	4.46997	456.785	18.6972	482.333	110.011	451.727	4.46997	93.6546
256.327	49269.7	2.16769	0.571133	1.46849	0.0728421	0.65961	0.449174		453.256	2.88704	458.747	5.42039	486.323	28.939	453.256	2.88704	93.2005
189.039	5299	5.59267	0.563225	3.26317	0.0728809	2.03037	0.622208		453.489	8.89112	453.623	11.9385	454.326	56.7284	453.489	8.89112	99.8158
158.369	138039	6.89367	0.572153	3.69303	0.072953	1.18281	0.320282		453.922	5.18437	459.406	13.6476	486.906	77.2348	453.922	5.18437	93.2258
162.923	44566.2	2.35358	0.55506	4.92531	0.07317	2.6265	0.533266		455.226	11.5441	448.306	17.8526	412.936	93.1589	455.226	11.5441	110.241
162.588	108844	3.70859	0.569786	2.46561	0.07326	0.815413	0.330714		455.766	3.58804	457.876	9.08737	468.5	51.5252	455.766	3.58804	97.282
165.947	44731.1	1.05831	0.573411	5.24078	0.0732711	1.77338	0.33838		455.833	7.80446	460.218	19.3956	482.188	108.992	455.833	7.80446	94.5342
169.741	77279.4	5.87034	0.562096	4.10219	0.0733351	2.44758	0.596651		456.217	10.7803	452.89	14.9893	436.01	73.3297	456.217	10.7803	104.635
130.099	31143.7	3.47875	0.569227	3.32598	0.0736831	2.24574	0.675212		458.307	9.93507	457.514	12.251	453.512	54.4876	458.307	9.93507	101.057
135.493	37170.2	1.94704	0.570591	4.61726	0.0737415	1.80923	0.39184		458.658	8.00984	458.397	17.034	457.067	94.2963	458.658	8.00984	100.348
506.995	206884	0.948483	0.574043	1.54678	0.0737574	0.991209	0.640822		458.753	4.38918	460.626	5.72784	469.956	26.3057	458.753	4.38918	97.6162
355.164	83678	1.65462	0.571667	2.68062	0.0737699	2.41895	0.902383		458.828	10.7131	459.092	9.90061	460.393	25.6128	458.828	10.7131	99.6601
169.66	41624.3	1.81261	0.582944	3.93094	0.0737799	1.23789	0.31491		458.888	5.48308	466.352	14.7	503.255	82.1599	458.888	5.48308	91.184
203.36	42248.6	9.3178	0.565602	2.72852	0.0738277	0.730003	0.267545		459.175	3.2354	455.166	10.0092	434.953	58.5588	459.175	3.2354	105.569
173.145	121688	2.13904	0.569958	4.11436	0.0738627	0.964537	0.234432		459.386	4.27675	457.987	15.1677	450.957	88.8592	459.386	4.27675	101.869
267.914	47440	2.91852	0.580577	2.23425	0.0740284	0.796607	0.356543		460.38	3.53953	464.832	8.33328	486.874	46.0835	460.38	3.53953	94.5583
149.804	57268.3	9.42017	0.559311	5.66113	0.0740515	2.01152	0.355322		460.518	8.9403	451.078	20.6211	403.212	118.557	460.518	8.9403	114.212
156.01	35416.1	1.33292	0.57832	3.82605	0.0741412	1.15164	0.300999		461.057	5.12427	463.381	14.2358	474.915	80.7261	461.057	5.12427	97.0821
204.64	38416	8.24532	0.561554	3.88026	0.0741796	0.78769	0.202999		461.287	3.50656	452.538	14.1695	408.305	85.0326	461.287	3.50656	112.976
289.34	142091	2.12248	0.583932	1.66415	0.0741834	0.786387	0.472547		461.31	3.50092	466.985	6.2295	494.962	32.3261	461.31	3.50092	93.201
125.591	72388.6	1.7401	0.55066	5.10311	0.0741839	1.6243	0.318296		461.313	7.23128	445.429	18.4026	364.174	109.129	461.313	7.23128	126.674
217.225	99869.2	6.17959	0.583449	3.28517	0.074221	1.24613	0.379321		461.536	5.5503	466.676	12.2916	492.06	67.0538	461.536	5.5503	93.7967
560.735	238096	10.9711	0.573881	2.1907	0.0742301	1.8184	0.830055		461.59	8.10012	460.522	8.11097	455.193	27.1344	461.59	8.10012	101.405
94.0632	19178.4	1.78108	0.581015	5.79029	0.0742727	3.72668	0.643609		461.846	16.6095	465.114	21.6096	481.256	97.9677	461.846	16.6095	95.9668
125.732	68474.8	2.13122	0.577814	5.27058	0.0744801	1.75657	0.333279		463.091	7.84921	463.055	19.6008	462.902	110.194	463.091	7.84921	100.041
503.663	280861	9.59365	0.572824	2.90511	0.0745442	2.6363	0.907469		463.475	11.7897	459.84	10.7436	441.694	27.1708	463.475	11.7897	104.931
256.049	97633	5.39313	0.572802	1.45558	0.0745733	0.673461	0.462674		463.65	3.01285	459.825	5.38272	440.738	28.7171	463.65	3.01285	105.198
384.72	116841	3.55763	0.584552	2.09243	0.0747094	1.89399	0.905164		464.466	8.48752	467.382	7.83801	481.753	19.6477	464.466	8.48752	96.4116
403.945	12336.8	8.79316	0.587041	2.64218	0.0748929	2.13016	0.806212		465.566	9.56765	468.976	9.92398	485.678	34.5098	465.566	9.56765	95.859
72.5544	26511.9	0.870539	0.581636	8.72502	0.0749281	3.99104	0.457425		465.778	17.9337	465.512	32.5904	464.211	172.153	465.778	17.9337	100.338
130.347	39083.9	2.14589	0.598774	6.53901	0.0749489	2.20412	0.337072		465.903	9.90673	476.455	24.8716	527.604	135.067	465.903	9.90673	88.3053
226.872	47449.7	4.6633	0.582196	2.06896	0.0750633	1.22156	0.590424		466.588	5.49829	465.872	7.73035	462.32	37.0346	466.588	5.49829	100.923
125.393	22302.4	3.28727	0.600256	3.3616	0.0751663	1.42161	0.422898		467.206	6.40689	477.396	12.804	526.675	66.798	467.206	6.40689	88.7085
114.725	53177	2.20108	0.59694	3.14358	0.0752052	1.5381	0.489282		467.44	6.93521	475.29	11.9321	513.358	60.2457	467.44	6.93521	91.0552
171.963	62225.4	9.88469	0.586367	5.46527	0.0755732	1.00067	0.183097		469.645	4.53251	468.545	20.5148	463.181	119.137	469.645	4.53251	101.396
175.792	145790	4.15132	0.583738	4.09538	0.0755869	3.29447	0.804436		469.727	14.9247	466.861	15.3282	452.765	54.0184	469.727	14.9247	103.747
115.106	36661	2.582	0.565575	6.629	0.0757466	4.04104	0.609601		470.685	18.3428	455.149	24.3208	377.413	118.273	470.685	18.3428	124.713
249.859	30842.7	1.62069	0.601395	1.98917	0.0759085	0.628143	0.315781		471.655	2.85688	478.119	7.58529	509.244	41.4974	471.655	2.85688	92.6186
358.803	13353.9	3.74048	0.619219	4.5048	0.0760289	3.40528	0.755924		472.376	15.5105	489.358	17.4939	569.686	64.2042	472.376	15.5105	82.9187
166.376	50717.6	2.53836	0.604113	3.03534	0.0764581	1.53607	0.506061		474.947	7.03324	479.841	11.6075	503.318	57.6266	474.947	7.03324	94.363
75.1063	19758.7	2.12149	0.589476	10.8751	0.0767007	6.58538	0.605546		476.399	30.2417	470.533	40.9743	441.997	192.818	476.399	30.2417	107.783
217.252	164356	7.79199	0.61527	3.00007	0.0784197	1.6145	0.538157		486.683	7.56824	486.878	11.6038	487.775	55.8141	486.683	7.56824	99.7761
225.065	52053.9	2.09026	0.619336	3.12778	0.0785127	1.46771	0.469251		487.239	6.8877	489.431	12.1472	499.726	60.8361	487.239	6.8877	97.5011
326.927	197723	18.9142	0.618563	4.55109	0.0791907	3.68189	0.809012		491.29	17.4167	488.947	17.6622	477.958	59.1622	491.29	17.4167	102.789
201.19	211347	1.20488	0.611789	3.98452	0.0793158	2.46559	0.618793		492.037	11.6802	484.688	15.3579	450.061	69.5381	492.037	11.6802	109.327
189.366	74049.3	8.59821	0.652114	3.91169	0.0821863	1.93836	0.49553		509.159	9.48966	509.779	15.6788	512.57	74.6964	509.159	9.48966	99.3347
114.157	13956.6	5.71305	0.690964	3.97913	0.0824068	1.906	0.478999		510.473	9.35435	533.38	16.5111	632.622	75.231	510.473	9.35435	80.6916
205.959	50795.9	2.73148	0.671865	2.30378	0.0832139	0.542647	0.235546		515.278	2.68731	521.846	9.4008	550.715	48.8852	515.278	2.68731	93.5652
138.023	68918.2	3.97458	0.692756	2.85993	0.0861355	0.851042	0.297574		532.641	4.35078	534.455	11.8848	542.198	59.6835	532.641	4.35078	98.2375
229.025	125924	2.11974	0.698482	2.15509	0.0872028	1.26537	0.587156		538.973	6.54269	537.884	8.99912	533.261	38.1951	538.973	6.54269	101.071
434.928	112627	9.22872	0.696753	1.55284	0.0873782	0.785008	0.50553		540.013	4.06645	536.85	6.47475	523.413	29.3875	540.013	4.06645	103.172
49.8756	26416	4.32383	0.670267	7.75521	0.0874395	1.75696	0.226552		540.376	9.10714	520.875	31.6101	436.226	168.391	540.376	9.10714	123.875
63.4479	41985	5.67394	0.704283	10.8533	0.0884298	1.39004	0.128075		546.244	7.28023	541.346	45.5712	520.753	236.809	546.244	7.28023	104.895
63.5446	21666.3	5.26212	0.703239	6.8871	0.0898704	1.88956	0.274362		554.771	10.0443	540.724	28.8809	481.949	146.459	554.771	10.0443	115.11
268.358	101916	1.0966	0.770334	1.57918	0.0936542	1.06614	0.675122		577.113	5.88543	579.955	6.97736	591.122	25.2401	577.113	5.88543	97.63
343.694	86266.8	6.07114	0.774429	5.82667	0.0936555	5.67392	0.973785		577.12	31.3226	582.3	25.8266	602.535	28.6871	577.12	31.3226	95.7821
131.839	85169.3	1.53098	0.782527	3.86852	0.093847	1.87588	0.48491		578.249	10.375	586.924	17.2457	620.602	73.0061	578.249	10.375	93.1755
111.248	48192.4	1.29648	0.771409	3.38937	0.0948082	1.27306	0.375603		583.911	7.10681	580.571	14.9881	567.546	68.3971	583.911	7.10681	102.884
197.732	103484	7.09253	0.851808	2.48953	0.102141	0.878321	0.352807		626.946	5.24731	625.641	11.6282	620.903	50.2528	626.946	5.24731	100.973
75.5117	32715.5	1.79818	0.862823	4.59378	0.103161	1.86365	0.405691		632.91	11.2347	631.663	21.608	627.181	90.5095	632.91	11.2347	100.913
346.577	147952	1.01203	0.868965	1.64683	0.103309	1.26359	0.767283		633.773	7.62719	635.005	7.77479	639.413	22.7167	633.773	7.62719	99.118
200.625	33126.2	3.20109	0.929926	4.70483	0.105404	0.832626	0.176973		646.002	5.11806	667.595	23.0227	741.166	97.9756	646.002	5.11806	87.1602
88.1363	15371.5	0.994152	0.894122	6.75261	0.105806	5.41325	0.801653		648.345	33.3896	648.581	32.377	649.411	86.7318	648.345	33.3896	99.8359
216.848	87515.6	1.60515	0.89639	1.93399	0.106177	0.686638	0.355037		650.507	4.24866	649.797	9.28251	647.351	38.8605	650.507	4.24866	100.488
297.628	29217.4	2.29159	0.957351	1.51757	0.106873	1.36362	0.898554		654.564	8.48755	681.923	7.53683	773.284	14.0156	654.564	8.48755	84.6474
135.864	50768.1	1.41927	1.133	2.00449	0.12143	1.37273	0.684831		738.792	9.58209	769.182	10.8116	858.466	30.3304	738.792	9.58209	86.0595
212.969	52931.6	1.37733	1.10646	2.11608	0.124933	1.52915	0.722632		758.895	10.9476	756.469	11.2866	749.285	30.9012	758.895	10.9476	101.283
153.517	85295.1	1.53549	1.14036	3.45115	0.125258	3.15225	0.913391		760.757	22.6201	772.681	18.6723	807.28	29.4102	760.757	22.6201	94.2371
144.189	119598	4.00285	1.82601	1.60885	0.179087	1.04447	0.649205		1061.98	10.2267	1054.85	10.5558	1040.08	24.7213	1040.08	24.7213	102.106
77.5788	27691	0.715006	1.65821	6.77602	0.162511	5.77638	0.852474		970.716	52.0558	992.692	42.9451	1041.56	71.4967	1041.56	71.4967	93.1985
46.0948	71310.3	0.768445	4.97877	1.86756	0.318986	1.47123	0.787781		1784.77	22.9368	1815.72	15.7925	1851.41	20.7984	1851.41	20.7984	96.4008
444.151	275893	5.55492	4.82335	1.6377	0.291286	1.63029	0.995477		1647.95	23.7073	1788.98	13.7742	1957.63	2.77768	1957.63	2.77768	84.1809
356.258	242863	2.92166	6.07952	1.51065	0.359782	1.49582	0.990185		1981.14	25.5136	1987.31	13.173	1993.73	3.75363	1993.73	3.75363	99.3684
324.128	287849	1.26065	5.75373	0.932039	0.333032	0.915512	0.982268		1853.06	14.7444	1939.48	8.06267	2033.07	3.09259	2033.07	3.09259	91.146

## Sheet: Monazite analyses
Table 2.2 - Monazite analyses
Analysis (ppm)				Counting statistics				Calculated age (Ma)
Y	Th	U	Pb	Y (1sigma)	U (1sigma)	Th (1sigma)	Pb (1sigma)	Age (Ma)	+	-
Sample 1DG
1069.55	54929	7914.96	1159.35	0.004756	0.018452	0.058408	0.005892	321.88	16.4549	16.4707
124.52	44074.2	6058.67	1340.19	0.004366	0.021354	0.052763	0.00809	467.964	28.2967	28.3438
13727.7	68350	5801.69	1088.66	0.013784	0.01979	0.07577	0.008524	273.936	21.9055	21.937
3152.67	29039.2	5369.24	738.17	0.007782	0.019924	0.038802	0.00865	352.999	41.218	41.3788
1438.13	34454	5743.36	817.07	0.006748	0.020737	0.044347	0.009194	343.624	38.3894	38.5243
16759.5	33273.7	5847.7	743.78	0.015826	0.02041	0.04265	0.008173	306.534	34.7961	34.9078
0.1	59468.1	6157.74	1379.85	-7e-06	0.020928	0.067926	0.00966	388.029	27.0779	27.1275
2945.47	44465.6	5364.88	1073.3	0.007309	0.019647	0.053145	0.009071	385.711	32.542	32.6233
15014.1	29132.6	6589.02	770.48	0.014815	0.021677	0.039444	0.008165	330.055	35.8904	36.0165
6804.75	43739.8	7346.34	1079.82	0.009551	0.022466	0.053015	0.009006	353.665	29.6254	29.7003
7269.01	44513.4	7426.55	1101.1	0.009906	0.022674	0.053807	0.009241	354.98	29.9289	30.0058
8861.53	49294	6563.73	1240.25	0.010803	0.021491	0.058263	0.009078	387.537	28.6018	28.663
2304.31	17332.3	8108.22	874.34	0.007273	0.023544	0.028468	0.009082	444.069	45.508	45.7534
4630.13	43626.5	12339.8	1386.46	0.008438	0.028835	0.052849	0.00955	368.642	25.3752	25.4351
1689.14	39899.8	8289.15	1020.85	0.00707	0.023653	0.049383	0.009231	341.437	30.6895	30.7783
5197.03	44872.1	10155.5	895.5	0.008707	0.026106	0.054194	0.009308	256.406	26.7125	26.7844
12067.5	38786.5	6363.3	1066.04	0.012784	0.021056	0.047928	0.008675	392.567	32.3731	32.4601
4887.65	67944	4822.66	1357.49	0.008509	0.019136	0.075909	0.009451	360.796	25.2594	25.2964
1990.84	41604.2	4911.4	848.57	0.006898	0.019509	0.05082	0.009143	329.001	35.3162	35.4173
12366	47498	6370.51	1108.54	0.012487	0.021082	0.056472	0.008777	356.601	28.6614	28.725
9426.11	64981.4	11692.9	1454.26	0.010774	0.027821	0.072994	0.009189	313.32	19.9945	20.0256
2930.06	34240.3	4659.11	815.98	0.007213	0.019259	0.044027	0.008897	367.377	39.9404	40.0747
24147	44616.4	11118.9	1345.59	0.01972	0.02726	0.053838	0.008661	361.254	23.9367	23.9851
11971.8	110405	5216.14	2042.36	0.012264	0.018977	0.116298	0.009662	354.892	17.144	17.1509
16962.4	38319.3	13976.5	1491.08	0.015271	0.030959	0.047838	0.009002	390.21	23.9565	24.0064
12854.1	38414	3467.46	906.33	0.012788	0.017671	0.047806	0.008541	397.128	38.1735	38.275
18577.7	47405.4	10104.3	1262.52	0.016229	0.025723	0.056352	0.008741	343.412	24.3077	24.3583
7799.61	48855.1	5390.89	895.71	0.010021	0.020238	0.057717	0.00902	298.101	30.3091	30.3809
18570	45631.6	10698.6	1270.38	0.01625	0.026628	0.054664	0.008775	344.962	24.3508	24.4027
9769.11	29080.6	6827.52	818.75	0.010935	0.021819	0.039118	0.008635	350.277	37.3291	37.4687
Sample 2BB
1243.19	34610.3	5507.77	856.98	0.006658	0.020467	0.044394	0.009245	364.383	39.0083	39.1442
3041.49	37887.6	3012.89	677.94	0.007363	0.01651	0.046827	0.008343	316.094	38.947	39.0564
17743.5	108398	5628.5	1917.02	0.016616	0.019561	0.114384	0.009485	333.082	16.9032	16.9117
6001.09	52468.6	6101.52	1095.25	0.009069	0.020795	0.061177	0.009113	336.081	28.0965	28.1562
11870.2	39071	8399.6	924.84	0.012728	0.023715	0.048593	0.008627	305.854	28.9693	29.0494
547.77	39673.5	3115.01	764.97	0.006289	0.017449	0.049113	0.009359	343.455	41.7493	41.8751
248.28	31061.4	3063.94	753.24	0.006188	0.017593	0.041144	0.009238	409.786	49.7919	49.9816
1829.88	40616.8	6055.64	826.45	0.007127	0.021336	0.049965	0.009535	306.451	35.1731	35.2837
2887.81	44242.4	7920.95	1124.85	0.007363	0.023202	0.05344	0.009361	358.304	29.7247	29.8023
504.11	37632.6	4065.91	946.68	0.006219	0.018622	0.047193	0.009211	415.242	40.1137	40.2353
1742.19	46305.3	5343.89	960.62	0.006734	0.02004	0.055426	0.009387	336.914	32.7924	32.8775
2575.08	35930.8	3570.43	837.37	0.007275	0.018141	0.045799	0.009201	391.483	42.8874	43.0265
1122.35	47233.8	4324.02	915.68	0.006572	0.018809	0.056354	0.009315	333.938	33.826	33.91
1937.65	34652.3	4732.96	824.47	0.006933	0.019468	0.044539	0.009156	367.191	40.5517	40.6915
6556.85	35772.3	5894.51	863.05	0.009456	0.020945	0.045657	0.008921	347.234	36.0543	36.1702
1527.85	45764.3	3508.76	1076.21	0.006844	0.017816	0.054958	0.009622	419.081	37.3405	37.4332
7011.03	37699	5240.08	822.07	0.009762	0.02016	0.047416	0.009048	331.555	36.7347	36.8503
882.25	43923.2	4350.77	913.71	0.006481	0.018961	0.053273	0.009386	351.656	35.9234	36.0208
733.25	32460.9	2878.92	635.55	0.006476	0.017193	0.042428	0.009309	339.638	49.3786	49.566
1925.59	47888.2	4904.61	999.77	0.006916	0.019628	0.057008	0.009263	349.466	32.2926	32.37
17534.8	36804.2	10452.6	1077.76	0.016546	0.026377	0.046667	0.008606	331.831	27.0896	27.1614
5861.96	47621.8	4613.32	946.53	0.009	0.019146	0.056715	0.009079	334.853	32.2872	32.3639
471.33	22614.1	4429.7	548.52	0.006317	0.01935	0.033376	0.009106	331.932	54.4238	54.7232
6382.86	38381.2	6385.76	984.26	0.009332	0.021397	0.048037	0.009049	368.193	33.9548	34.0555
1819.94	44375.6	3723.7	943.99	0.0069	0.01814	0.053667	0.009301	372.469	36.5901	36.6842
5966.41	44140.2	3036.52	817.83	0.009062	0.017128	0.053423	0.008878	334.604	36.5957	36.6857
1451.48	28533.6	22762.8	1107.49	0.006656	0.043188	0.038762	0.009364	244.116	20.5568	20.6069
3025.03	47044.7	4380.53	920.9	0.007445	0.018703	0.056094	0.009132	334.622	33.1714	33.2521
4116.9	38375.8	6034.84	913.03	0.00805	0.020986	0.048092	0.009156	349.85	35.0516	35.1595
6539.32	41018.2	4100.14	913.92	0.009411	0.018569	0.050504	0.008924	371.304	36.4798	36.5782
Sample 3SP
10442.4	42464.6	6235.53	1193.56	0.011761	0.021091	0.051814	0.009133	418.065	32.2882	32.3701
15108.3	32922.3	6317.17	1004.62	0.014848	0.021234	0.042799	0.008375	408.46	34.719	34.8227
7098.66	42221.8	10119.8	1202.99	0.009829	0.025782	0.051533	0.009093	355.114	26.9343	27.0013
3619.44	42975.1	4800.35	904.96	0.007741	0.019503	0.052383	0.009183	343.528	34.8531	34.9483
807.7	49914.3	4073.88	993.1	0.006309	0.018512	0.058934	0.009471	351.418	33.3707	33.4482
15721.7	37427.9	7184.73	927.66	0.015251	0.022222	0.047036	0.008433	331.913	30.8787	30.9652
2153.72	40896.4	5291.87	877.08	0.006878	0.019927	0.050431	0.009248	336.822	35.3715	35.476
8.32	52556.1	8297.66	1062.66	0.005873	0.023506	0.061212	0.009701	300.101	27.2001	27.265
12932.5	58724.2	6144.7	1515.58	0.013375	0.020779	0.067183	0.009164	423.188	25.9775	26.0187
11887.5	52343.4	6701.66	1177.46	0.012707	0.021572	0.061197	0.009079	349.289	27.3001	27.3568
388.25	56704.7	6778.61	1255.37	0.006378	0.021787	0.065375	0.009621	356.723	27.2237	27.2789
427.36	42424.9	4893.29	973.8	0.006135	0.019363	0.051705	0.009291	373.142	35.3556	35.4534
346.8	34847.9	3151.14	755.52	0.006227	0.017386	0.044528	0.009046	374.384	44.4805	44.628
290.71	36759.3	3066.94	752.31	0.006103	0.017345	0.04645	0.009269	359.963	44.0124	44.1546
3103.8	44046.7	3703.45	893.27	0.00761	0.017862	0.05338	0.008995	354.212	35.6703	35.7602
1087.87	37741.2	4593.05	906.51	0.006511	0.019319	0.047386	0.009317	383.984	39.2001	39.3239
13475	35168.4	6870.62	964.12	0.013821	0.022087	0.045106	0.008717	365.985	33.6465	33.7492
15709	59574.8	6251.09	1331.26	0.015239	0.020963	0.067994	0.00898	364.91	25.1038	25.1453
5345.35	47607.6	7756.87	1072.3	0.008648	0.022889	0.056595	0.009095	327.319	27.828	27.8943
6585.03	45985.7	7107.95	1076.16	0.009414	0.022248	0.05527	0.009164	345.18	29.5172	29.5903
2089.34	13234	2448.22	379.32	0.007028	0.017377	0.024751	0.008771	396.142	90.8799	91.7018
5976.45	35159.6	6526.64	800.65	0.009096	0.02156	0.044918	0.008942	314.574	35.2619	35.38
438.69	32770.9	7319.64	913.52	0.006211	0.022515	0.042726	0.009348	361.474	36.5941	36.7269
3550.44	46903.7	3797.89	945.79	0.007702	0.018081	0.055987	0.009159	354.807	34.3943	34.4762
8676.02	27434	6255.66	751.85	0.010709	0.021325	0.037889	0.008696	345.585	40.3353	40.4994
1913.95	47090.9	4934.5	1098.11	0.006905	0.019596	0.056256	0.009404	387.584	33.093	33.1731
6974.64	48313.9	11182.3	1373.33	0.00966	0.027325	0.057367	0.009455	360.102	24.8773	24.932
1195.35	35277.3	4012.06	744.94	0.006561	0.018614	0.045089	0.009213	344.316	42.3084	42.4544
18990.1	68907.9	8928.58	1495.07	0.01747	0.024315	0.076875	0.009117	334.345	20.8572	20.8866
7797.39	91420.4	7073.92	1797.33	0.010083	0.021618	0.09821	0.009655	348.857	18.9689	18.9859
Sample 4TR
667.26	35139.6	3465.44	665.6	0.006481	0.018078	0.044956	0.009233	320.944	44.2019	44.3564
19230.1	32263.5	7247.55	1249.97	0.017674	0.022425	0.042252	0.008702	484.292	34.4224	34.5204
18975.2	46379.5	5258.53	1061.59	0.017489	0.019808	0.055467	0.008593	362.26	30.1537	30.2201
2381.83	45137.7	7864.61	978.29	0.007218	0.023115	0.054262	0.009254	309.331	29.1585	29.2354
235.53	38077.2	6541.87	1140.54	0.006393	0.021648	0.047743	0.009484	428.711	35.3359	35.4428
18055	36787.4	7711.98	943.46	0.016886	0.022915	0.046478	0.008525	330.446	30.6694	30.7573
15601.3	31057.9	5477.67	754.21	0.015271	0.020393	0.041236	0.008286	333.269	37.6757	37.8053
19508.9	38830.6	4836.72	934.72	0.017863	0.019477	0.048368	0.008332	368.979	33.9639	34.0524
253.77	46348.6	3520.61	992.4	0.006279	0.017795	0.055468	0.009437	383.627	36.2802	36.369
3525.48	42625.2	14026.4	1347.85	0.007754	0.031042	0.051888	0.009457	341.289	23.9044	23.9597
908.49	44942.5	6491.06	1141.03	0.006528	0.021558	0.054085	0.009587	385.777	32.2121	32.2972
15287	36066.1	6730.63	948.65	0.015037	0.022035	0.045815	0.008593	356.117	32.9507	33.0474
21591.4	75185.3	3746.28	1293.03	0.019277	0.017677	0.082826	0.0088	321.487	22.5908	22.6157
8213.69	36523.6	6369.52	963.16	0.010459	0.021583	0.046221	0.00896	370.912	34.7322	34.8388
18254.5	17743.9	5984.04	673.54	0.01704	0.021224	0.028873	0.008102	385.499	48.0286	48.284
29253.2	29286.6	4260.9	789.16	0.024617	0.019089	0.039606	0.007886	381.853	40.568	40.7019
12860.8	43938.6	4485.95	918.87	0.013344	0.019042	0.053274	0.008585	342.795	32.671	32.7494
1057.2	37737.4	4975.27	810.87	0.0065	0.019728	0.047434	0.009279	336.305	38.2191	38.3434
8435.57	42506.1	1199.2	627.81	0.010593	0.013879	0.051865	0.008488	295.734	40.7847	40.8773
3248.36	42583.9	6721.59	1071.95	0.007487	0.021658	0.05177	0.009122	370.299	31.4459	31.5291
21758.6	55434.2	7428.7	1100.89	0.019392	0.022245	0.064104	0.008313	299.531	23.3776	23.4191
2538.82	41118.6	5509.02	975.56	0.007238	0.020465	0.050578	0.009264	368.122	34.8395	34.9389
11824.9	39760.2	7616	1049.99	0.012724	0.022848	0.049324	0.008915	357.187	30.7089	30.7933
529.23	31805	5215.93	804.9	0.006336	0.020103	0.041803	0.009298	369.042	42.1993	42.362
3478.12	34032.1	4542.81	847.85	0.007628	0.01915	0.043784	0.009032	385.608	40.9874	41.1273
1453.35	42160.3	4333.91	981.65	0.006625	0.018791	0.051447	0.009246	389.03	36.4769	36.5759
17003.8	80886.8	4099.46	1221.68	0.016121	0.01795	0.088316	0.009059	283.503	21.5674	21.5918
3389.68	38332.7	3596.5	844.61	0.007667	0.018142	0.047978	0.009121	374.852	40.4612	40.5824
Sample 5PS
600.64	49359.5	7770.13	1054.19	0.006284	0.022922	0.058264	0.009443	316.716	28.1961	28.265
3681.83	38016	6238.29	894.61	0.007739	0.021178	0.047577	0.009065	341.432	34.539	34.6455
15074.7	34702.4	5762.92	875.06	0.014714	0.020184	0.044691	0.00862	355.428	35.8023	35.9161
12199.4	58816.9	10099.6	1353.6	0.012949	0.025629	0.067191	0.009064	325.972	22.1171	22.156
12012.1	46950.7	12369.6	1450.44	0.012853	0.028938	0.056087	0.009273	367.196	23.7245	23.7733
5608.19	49498.7	8365.08	1144.49	0.008729	0.023349	0.058215	0.009085	331.734	26.4041	26.4635
17722.5	50771.1	10982.3	1391.66	0.016591	0.026926	0.059608	0.008902	352.428	22.994	23.0374
7280.79	30183.2	6131.88	841	0.00988	0.021202	0.040424	0.008832	369.842	39.0213	39.1664
1589.22	47984.2	2706.22	970.78	0.006743	0.016612	0.057034	0.009309	380.968	36.4652	36.5466
1757.01	56883	7392.66	1210.21	0.006863	0.022426	0.065512	0.009568	334.352	26.3657	26.4199
19299.7	34457	9985.67	922.48	0.017769	0.025576	0.044255	0.008052	298.458	26.8652	26.9379
278.48	40478.7	5300.03	941.65	0.00631	0.020134	0.050006	0.009356	365.01	35.9777	36.0844
17521.2	35739.1	4604.72	836.26	0.016529	0.019414	0.045661	0.008435	355.338	36.9659	37.0758
5814.56	26556.4	2885.76	558.19	0.009137	0.017526	0.036907	0.008582	341.396	52.9553	53.1828
11563.9	37494.1	6610.92	966.09	0.01257	0.021765	0.047236	0.008849	358.93	33.3171	33.4154
11902.6	49669.3	9658.12	1316	0.012801	0.025183	0.058611	0.009122	357.744	25.0812	25.134
6770.58	41421.2	7244.27	1086.31	0.009524	0.022346	0.05078	0.009121	370.057	31.1769	31.2613
11027	35520.9	10198.5	1004.41	0.012225	0.026126	0.045437	0.009019	322.074	29.224	29.3122
778.38	46363.3	6280.8	1027.49	0.006352	0.020931	0.055525	0.009353	344.245	31.147	31.2269
6610.85	42594.1	3794.29	933.37	0.009502	0.018188	0.052065	0.00898	375.137	36.3315	36.4249
1309.54	34017.6	9847.28	1011.92	0.006689	0.025689	0.043969	0.009371	343.045	31.4975	31.6013
1377.64	36788.2	4215.89	857.25	0.006663	0.018673	0.046491	0.009239	378.583	40.5522	40.6833
17408.1	39588.2	7316.6	956.74	0.016441	0.022377	0.049158	0.008528	327.623	29.9668	30.0472
7541.83	41972.1	4102.33	1173.8	0.009963	0.018556	0.051338	0.009234	467.262	36.9842	37.0768
3762.62	45669.9	5421.17	939.98	0.007809	0.020155	0.054951	0.009203	330.478	32.3611	32.4445
16294.7	37986.7	4956.98	900.94	0.015636	0.019633	0.047641	0.008474	360.652	34.8164	34.913
17605.2	46497	8475.37	1152.92	0.016608	0.023849	0.05579	0.008663	339.499	26.0939	26.1511
1016.91	72441	9312.34	1614.67	0.006364	0.024588	0.080161	0.009867	351.65	21.4859	21.5176
994.82	31942.3	5210.46	729.76	0.006539	0.01991	0.041885	0.009114	333.945	41.3528	41.5111
12708.5	46837.3	9058.45	1023.77	0.013244	0.024556	0.056083	0.009036	294.92	26.4379	26.5022
Sample 6PSR
13625.3	46510.9	9946.47	1191.5	0.013242	0.025565	0.055478	0.008809	332.093	24.9276	24.9825
995.95	57538.5	5041.9	1268.39	0.006444	0.019419	0.065948	0.009413	382.987	28.3713	28.4237
6267.82	50969	9283.84	1122.5	0.008937	0.024662	0.059648	0.009059	307.547	24.9231	24.9776
4692.99	32019.2	5267.15	815.78	0.008066	0.019733	0.041882	0.008959	367.75	40.3705	40.5182
11073.2	34981.4	6076.45	1116.71	0.011707	0.021004	0.044682	0.00894	446.717	36.108	36.2163
17583.7	33536.2	6356.36	870.54	0.01564	0.021252	0.043338	0.00827	346.92	33.9095	34.0137
5805.42	33338.5	4610.1	777.84	0.008803	0.019327	0.043151	0.008817	355.594	40.4705	40.6101
2471.45	39923.2	5120.62	888.03	0.007069	0.019566	0.049227	0.009023	349.823	35.4297	35.5329
2021.47	45173.3	4095.77	1054.56	0.006822	0.018313	0.054223	0.009284	401.363	35.2414	35.3284
8815.75	41701.5	7769.95	1063.86	0.010404	0.022932	0.050965	0.008951	350.72	29.7277	29.8061
7604.34	40904.7	7222.3	951.73	0.009732	0.022224	0.050209	0.008857	326.87	30.6164	30.7006
16170.7	31540.2	6472.03	827.38	0.014795	0.021571	0.041475	0.008386	340.463	35.4261	35.5447
17120.8	51618	9478.32	1202.96	0.01529	0.024929	0.060345	0.008738	319.176	23.6873	23.7343
18220.4	43070.6	7004.38	947.33	0.016011	0.021916	0.052251	0.00837	311.81	28.3568	28.4256
1008.28	54672.9	3766.99	1156.03	0.006398	0.017815	0.063226	0.00941	385.46	31.3109	31.3718
18133.5	44652.2	6971.8	887.75	0.015996	0.021912	0.05376	0.008301	285.508	27.5455	27.6107
1824.09	37537.5	252.97	575.56	0.006676	0.007776	0.046963	0.008914	333.623	51.6513	51.782
10108	34839.5	6112.99	885.44	0.011114	0.020863	0.044448	0.00858	355.09	34.8176	34.926
475.04	38930.2	3136.37	759.1	0.006053	0.017279	0.048335	0.009161	345.533	41.4261	41.5504
17255.1	48452.5	7281.15	1014.24	0.015357	0.022044	0.057341	0.00842	306.052	26.0738	26.1297
505.44	40516.5	4158.72	861.99	0.006187	0.01862	0.049867	0.009276	356.681	38.1165	38.2284
1078.61	37919.1	5109.14	893.42	0.006405	0.019603	0.047297	0.00913	365.908	37.1379	37.2533
1392.3	39219.2	6984.21	945.8	0.006409	0.021675	0.048524	0.009157	341.499	32.8433	32.9421
1385.4	38010.8	6668.92	920.94	0.006533	0.021446	0.047428	0.009171	344.874	34.1082	34.2146
10368.7	38288.7	6736.63	939.6	0.011277	0.021596	0.047748	0.008703	342.983	32.1455	32.2376
17107.5	55452.2	4314.42	1898.18	0.0153	0.018363	0.063881	0.009332	595.589	29.9446	29.9818
8724.25	41592.8	11492.7	1009.28	0.010331	0.027689	0.050888	0.008843	283.343	25.0287	25.0922
3007.6	36355.2	3090.96	771.79	0.007212	0.017176	0.04591	0.009014	369.39	43.0984	43.2339
9874.45	41544.8	7271.15	1067.33	0.011016	0.022262	0.050812	0.008901	360.602	30.3547	30.4344
14040	27070.7	6188.55	730.15	0.013536	0.02116	0.037348	0.008281	335.146	38.9399	39.0915
